# Supplementary material for: The Divergent Roles of the Rice bcl-2 Associated Athanogene (BAG) Genes in Plant Development and Environmental Responses
Source: MDPI journal article supplement (doi:10.3390/plants10102169), 2021-10-13
Supplement: s1 [file s1]

**Additional File S1. Tissues and developmental stages throughout the life cycles of three rice varieties**

**Additional File S2. Signal intensities of the probe sets for the *OsBAG* and *OsCESA* families**

**Additional File S3. Primers used in this study**

**Additional File S4. Subcellular locations of OsBAGs proteins**

**Additional File S5. Chromosomal distribution of the *OsBAG* gene family**

**Additional File S6. Details of the 10 putative motifs**

**Additional File S7. Gene expression of *OsBAG1* and 3 revealed by qRT-PCR**

**Additional File S8. Top 100 co-expressed genes of the *OsBAGs* and *OsCESAs***

**Additional File S9. Co-expression gene vicinity network for *OsCESAs***

**Additional File S10. Promoter analysis of *OsBAGs***

The horizontal axis shows the six genes of *OsBAG*, and the vertical axis shows the corresponding cis- elements, the darker the color is the more cis- elements represented.

**Additional File S11. Hierarchical cluster analysis of *OsBAGs* and *OsCESAs***

**Additional File S12. Pearson correlation coefficient of *OsBAGs* and *OsCESAs* expression pattern**
