# Supplementary material for: The Divergent Roles of the Rice bcl-2 Associated Athanogene (BAG) Genes in Plant Development and Environmental Responses
Source: Plants (Basel). 2021 Oct 13;10(10):2169. doi: 10.3390/plants10102169 (PMC8538510; doi:10.3390/plants10102169)
Supplement: Supplementary file 1 [file plants-10-02169-s001.zip]

Archive with 13 entries (13 files):
- Additional File S1. Tissues and developmental stages throughout the life cycles of three rice varieties.XLS
- Additional File S10. Promoter analysis of OsBAGs.tif
- Additional File S11. Hierarchical cluster analysis of OsBAGs and OsCESAs.bmp
- Additional File S12. Pearson correlation coefficient of OsBAGs and OsCESAs expression pattern.xlsx
- Additional File S2. Signal intensities of the probe sets for the OsBAG and OsCESA families.xlsx
- Additional File S3. Primers used in this study.xlsx
- Additional File S4. Subcellular locations of OsBAGs.xlsx
- Additional File S5. Chromosomal distribution of the OsBAG gene family.tif
- Additional File S6. Details of the 10 putative motifs.xlsx
- Additional File S7. Gene expression of OsBAG1 and 3  revealed by qRT-PCR.bmp
- Additional File S8. Top 100 co-expressed genes of the OsBAGs and OsCESAs.xlsx
- Additional File S9. Co-expression gene vicinity network for OsCESAs.tif
- Legends of the Additional Files S1-S12.pdf
