# Supplementary material for: The Divergent Roles of the Rice bcl-2 Associated Athanogene (BAG) Genes in Plant Development and Environmental Responses
Source: Plants (Basel). 2021 Oct 13;10(10):2169. doi: 10.3390/plants10102169 (PMC8538510; doi:10.3390/plants10102169)
Supplement: Supplementary file 1 [file plants-10-02169-s001.zip › Additional File S1. Tissues and developmental stages throughout the life cycles of three rice varieties.XLS]

## Sheet: file 1
Additional file 1. Tissues and developmental stages throughout the life cycles of Zhenshan 97 (ZS97) and Minghui 63 (MH63)
Sample No	Abbreviation	Tissues or organ	Developmental stages
M1(Minghui)/Z1(Zhenshan)	Calli 1	Calli	15 DAS (days after subculture)
M2(Minghui)/Z2(Zhenshan)	Calli 2	Calli	5 DAR (days after regeneration)
M3(Minghui)/Z3(Zhenshan)	Calli 3	Calli	Screening stage
M4(Minghui)/Z4(Zhenshan)	Calli 4	Calli	15 DAI T2 (days after induction)
M5(Minghui)/Z5(Zhenshan)	Calli 5	Calli	15 DAI T3 (days after induction)
M6(Minghui)/Z6(Zhenshan)	Seed imbibition	Seed	72 h after imbibition
M7(Minghui)/Z7(Zhenshan)	Seed germination	Embryo bud and radicle	3 days after germination
M8(Minghui)/Z8(Zhenshan)	Plumule/Dark	Plumule	48 hours after emergence, Dark
M9(Minghui)/Z9(Zhenshan)	Plumule/Light	Plumule	48 hours after emergence, Light
M10(Minghui)/Z10(Zhenshan)	Radicle/Dark	Radicle	48 hours after emergence, Dark
M11(Minghui)/Z11(Zhenshan)	Radicle/Light	Radicle	48 hours after emergence, Light
M12(Minghui)/Z12(Zhenshan)	Seedlings	Seedling	Three-leaf stage
M13(Minghui)/Z13(Zhenshan)	Young shoot	Shoot	Seedlings with 2 tillers
M14(Minghui)/Z14(Zhenshan)	Young root	Root	Seedlings with 2 tillers
M15(Minghui)/Z15(Zhenshan)	Mature leaf	Leaf	Stage 3(secondary branch primordium differentiation stage)
M16(Minghui)/Z16(Zhenshan)	Old leaf	Leaf	4–5 cm young panicle
M17(Minghui)/Z17(Zhenshan)	Mature sheath	Sheath	Stage 3
M18(Minghui)/Z18(Zhenshan)	Old sheath	Sheath	4–5 cm young panicle
M19(Minghui)/Z19(Zhenshan)	Young flag leaf	Flag leaf	5 DBH (5 days before heading)
M20(Minghui)/Z20(Zhenshan)	Old flag leaf	Flag leaf	14 DAH (14 days after heading)
M21(Minghui)/Z21(Zhenshan)	Panicle, stage 3	Young Panicle	Stage 3
M22(Minghui)/Z22(Zhenshan)	Panicle, stage 4	Young Panicle	Stage 4 (pistil/stamen primordium differentiation stage)
M23(Minghui)/Z23(Zhenshan)	Panicle, stage 5	Young Panicle	Stage 5 (pollen-mother cell formation stage)
M24(Minghui)/Z24(Zhenshan)	Young panicle	Panicle	4–5 cm young panicle
M25(Minghui)/Z25(Zhenshan)	Old panicle	Panicle	Heading stage
M26(Minghui)/Z26(Zhenshan)	Young stem	Stem	5 DBH
M27(Minghui)/Z27(Zhenshan)	Old stem	Stem	Heading stage
M28(Minghui)/Z28(Zhenshan)	Hull	Hull	1 DBF (1 day before flowering)
M29(Minghui)/Z29(Zhenshan)	Spikelet	Spikelet	3 DAP (3 days after pollination)
M30(Minghui)/Z30(Zhenshan)	Stamen	Stamen	1 DBF
M31(Minghui)/Z31(Zhenshan)	Endosperm 1	Endosperm	7 DAP (7 days after pollination)
M32(Minghui)/Z32(Zhenshan)	Endosperm 2	Endosperm	14 DAP (14 days after pollination)
M33(Minghui)/Z33(Zhenshan)	Endosperm 3	Endosperm	21 DAP (21 days after pollination)
		Plumule	48 hours after emergence, light

## Sheet: file 2
Additional file 1. Tissues and developmental stages throughout the life cycles of Nipponbare
Cultivar	Abbreviation	Tissues or organ	Developmental stages
Nipponbare	Young root	Root_vegetative_12:00	27 days after transplanting
Nipponbare	Mature root	Root_reproductive_12:00	76 days after transplanting
Nipponbare	Mature stem	Stem_reproductive_12:00	before heading
Nipponbare	Old stem	Stem_ripening_12:00	after heading
Nipponbare	Young leaf blade	Leaf blade_vegetative_12:00	27 days after transplanting
Nipponbare	Mature leaf blade	Leaf blade_reproductive_12:00	76 days after transplanting
Nipponbare	Old leaf blade	Leaf blade_ripening_12:00	125 days after transplanting
Nipponbare	Young sheath	Leaf sheath_vegetative_12:00	27 days after transplanting
Nipponbare	Mature sheath	Leaf sheath_reproductive_12:00	76 days after transplanting
Nipponbare	Inflorescence 1	Inflorescence_0.6-1.0 mm
Nipponbare	Inflorescence 2	Inflorescence_3.0-4.0 mm
Nipponbare	Inflorescence 3	Inflorescence_5.0-10.0 mm
Nipponbare	Lemma 1	Lemma from 1.5-2.0 mm floret
Nipponbare	Lemma 2	Lemma from 4.0-5.0 mm floret
Nipponbare	Lemma 3	Lemma from 7.0- mm floret
Nipponbare	Palea 1	Palea from 1.5-2.0 mm floret
Nipponbare	Palea 2	Palea from 4.0-5.0 mm floret
Nipponbare	Palea 3	Palea from 7.0- mm floret
Nipponbare	Pistil 1	Pistil from 05-10 cm inflorescence
Nipponbare	Pistil 2	Pistil from 10-14 cm inflorescence
Nipponbare	Pistil 3	Pistil from 14_18 cm inflorescence
Nipponbare	Ovary 1	Ovary at 01 day after flowering_10:00	1 day after flowering
Nipponbare	Ovary 2	Ovary at 03 days after flowering_10:00	3 days after flowering
Nipponbare	Ovary 3	Ovary at 05 days after flowering_10:00	5 days after flowering
Nipponbare	Anther 1	Anther_0.3-0.6 mm
Nipponbare	Anther 2	Anther_0.7-1.0 mm
Nipponbare	Anther 3	Anther_1.2-1.5 mm
Nipponbare	Anther 4	Embryo at 07 days after flowering	7 days after flowering
Nipponbare	Embryo 1	Embryo at 10 days after flowering	10 days after flowering
Nipponbare	Embryo 2	Embryo at 14 days after flowering	14 days after flowering
Nipponbare	Embryo 3	Embryo at 28 days after flowering	28 days after flowering
Nipponbare	Embryo 4	Endosperm at 07 days after flowering	7 days after flowering
Nipponbare	Endosperm 1	Endosperm at 10 days after flowering	10 days after flowering
Nipponbare	Endosperm 2	Endosperm at 14 days after flowering	14 days after flowering
Nipponbare	Endosperm 3	Endosperm at 28 days after flowering	28 days after flowering
Nipponbare	Endosperm 4	Endosperm at 42 days after flowering	42 days after flowering
