# Supplementary material for: The Divergent Roles of the Rice bcl-2 Associated Athanogene (BAG) Genes in Plant Development and Environmental Responses
Source: Plants (Basel). 2021 Oct 13;10(10):2169. doi: 10.3390/plants10102169 (PMC8538510; doi:10.3390/plants10102169)
Supplement: Supplementary file 1 [file plants-10-02169-s001.zip › Additional File S2. Signal intensities of the probe sets for the OsBAG and OsCESA families.xlsx]

## Sheet: CREP
Additional file 2. Signal intensities of the probe sets for the BAG and OsCESA families
id	Minghui 63(calli, T2, 15 days after induction)	Zhenshan 97(calli, T2, 15 days after induction)	Minghui 63(calli, T3, 15 days after induction)	Zhenshan 97(calli, T3, 15 days after induction)	Minghui 63(calli, 15 days after subculture)	Zhenshan 97(calli, 15 days after subculture)	Minghui 63(calli, 5 days after regeneration)	Zhenshan 97(calli, 5 days after regeneration)	Minghui 63(calli, screening stage)	Zhenshan 97(calli, screening stage)	Minghui 63(seed, 72h after imbibition)	Zhenshan 97(seed, 72h after imbibition)	Minghui 63(embryo and radicle after germination)	Zhenshan 97(embryo and radicle after germination)	Minghui 63(plumule, 48h after emergence, dark)	Zhenshan 97(plumule, 48h after emergence, dark)	Minghui 63(plumule, 48h after emergence, light)	Zhenshan 97(plumule, 48h after emergence, light)	Minghui 63(radicle, 48h after emergence, dark)	Zhenshan 97(radicle, 48h after emergence, dark)	Minghui 63(radicle, 48h after emergence, light)	Zhenshan 97(radicle, 48h after emergence, light)	Minghui 63(leaf and root at three-leaf stage)	Zhenshan 97(leaf and root at three-leaf stage)	Minghui 63(shoot, seedling with 2 tillers)	Zhenshan 97(shoot, seedling with 2 tillers)	Minghui 63(root, seedling with 2 tillers)	Zhenshan 97(root, seedling with 2 tillers)	Minghui 63(leaf, young panicle at stage 3)	Zhenshan 97(leaf, young panicle at stage 3)	Minghui 63(leaf, 4-5cm young panicle)	Zhenshan 97(leaf, 4-5cm young panicle)	Minghui 63(sheath, young panicle at stage 3)	Zhenshan 97(sheath, young panicle at stage 3)	Minghui 63(sheath, 4-5cm young panicle)	Zhenshan 97(sheath, 4-5cm young panicle)	Minghui 63(flag leaf, 5 days before heading)	Zhenshan 97(flag leaf, 5 days before heading)	Minghui 63(flag leaf, 14 days after heading)	Zhenshan 97(flag leaf, 14 days after heading)	Minghui 63(young panicle at stage 3)	Zhenshan 97(young panicle at stage 3)	Minghui 63(young panicle at stage 4)	Zhenshan 97(young panicle at stage 4)	Minghui 63(young panicle at stage 5)	Zhenshan 97(young panicle at stage 5)	Minghui 63(panicle, 4-5cm young panicle)	Zhenshan 97(panicle, 4-5cm young panicle)	Minghui 63(panicle, heading stage)
OsBAG1	899.6	1474.2	1136.3	1400.5	757.4	935.1	1227.7	1076.2	851.5	1046.4	2014.7	2191.5	4233.3	3789.9	1773.2	1932	2925.5	3037.4	3835.5	2912	4418.1	3402.2	2968.3	2660	2788	2580.1	2964	2689.1	349.4	1315.5	425.8	1232.4	632.7	3098	1849.9	2347.1	591.5	160	871.7	574.5	691.1	922.6	1060	1490.5	2383.6	1450.3	1121	1257.2	1128.9
OsBAG3	59	79	217	224.5	40.8	105.8	276.8	384.1	237.6	250.5	510.6	486.7	4650	3840.9	3570.3	3636.8	2937.1	3967	8246.1	5735.9	6282.8	7166.3	4084.8	2999.2	3283	2459.2	4248	4108.6	289	399.5	224.6	257.5	531.1	4682.1	2029.5	2536.4	184.1	73.2	42.1	26.3	215.5	179.5	189.4	214.4	240.4	237.1	123.9	440.3	671.4
OsBAG4	1990.2	2445.5	2140.5	1941.2	1842.7	1820.5	1979.7	1982	1774.7	1547.4	1673.1	1783.6	4433.9	4498.8	2875.5	1940.3	2638.4	3375.1	2519.9	2181.9	2083.2	1959.1	2549.2	2454.1	3193.8	3078.2	2498.6	2274	3342.6	2243.1	4292.9	2236.4	2620.8	3826.9	5665.6	3751	1639.2	1444	3043.5	2865.5	5276.2	5627.2	4842.8	5138.1	3761.8	3302.2	4081.4	2223.2	3209.5
OsBAG6	19.5	45.4	62.3	77.7	356.1	75.7	34.5	29.1	2.7	9.5	711.9	64.5	39.4	46.2	8.7	3.1	2.1	2.4	18.1	13.1	7.7	3	42.9	24.7	15.7	19	34.6	6.7	65.7	53.3	16.7	2.7	24.6	1.9	5.3	8.9	15.8	17.2	9.7	1.6	49.3	142.9	849.9	850.1	1088.8	249.9	21.7	5.3	2.4
OsCESA1	6265.1	5403.7	7104.9	7820.5	4747	5302.7	8661.3	8731.6	6119.2	6064.1	6733.1	6350.6	10897.3	10247.5	15383.5	12280.5	12864.3	12484.8	14474.3	13892.9	12424.6	13584	11901.6	12540.4	10136.3	9948.8	11086.2	10374	2445.8	3333.3	2617.4	3516.3	3444.4	10482.3	9170.8	9360.9	2573.7	782.1	462.6	356.3	5039.4	4885.7	3993.6	4889.5	5119	6212.8	6100.8	7956.3	6437.7
OsCESA2	1.6	1.4	26	15.1	5.8	18.2	79.9	116	165.4	167.4	117.9	98.5	388.3	385.1	177.4	134.7	175.6	216.1	32.4	35.5	87.7	101.2	249.1	293	200.7	121.1	132.7	124	4.1	149.4	3.6	167.6	56.9	115.2	3.3	195.4	85.8	35.8	25.3	1.5	472.4	742.3	441.7	463.3	559.8	830.7	32	443	13.3
OsCESA3	4290.8	3710.3	3815.5	4426	2563.1	2686.5	5631.3	5273.8	3573.3	4488	3236	4298.2	19830.9	21569.7	11272.1	8933.5	9519.7	10419.4	12284	12007	11526.6	11808.5	17723	19447.5	12018.1	12901.2	11528.9	11373.6	4068	3133.4	3162.3	2890.4	8127.8	19114.4	15404.3	15883.9	3850.2	1372.6	413.3	552.8	3515.1	3678.1	3145	3524.7	2953.7	3144.8	3593.4	5299.8	6937.8
OsCESA4	138	107.2	410.4	460	197.3	99.6	597.5	630.7	287.3	299.9	311.5	242.3	2955	2361.5	597.6	774.3	2751.6	3459.5	8683.8	7093.1	8399.8	7884.9	2282.6	2934.2	3094.8	2953.9	6346.2	5356.5	200.3	305	162.2	339.3	453.3	3871.1	3948.9	4504.1	137.9	43.6	32.2	17.4	375	225	215.1	193.2	245.7	206.4	307.6	290.1	10712.2
OsCESA5	3186.9	3276.8	2854.8	2521.3	2492.5	2343.3	4770.1	3110	2418.3	2465.5	3847.1	3781	5430.1	4541.2	7668.6	4833.9	6448.4	4252.8	6362.3	5641.4	6407.7	5290.9	3362	3107.2	3797.5	2712.5	4272.9	3485.9	424.5	1531.6	467.6	1521.2	436.7	1898.5	1398.2	1699.5	456.7	104.7	381.2	314.3	3101.9	2884.9	3429.4	2921.8	4042.5	3369.6	2310.5	4091.3	1301.6
OsCESA6	2667.7	4438.2	3805.1	4061.6	2717.2	4082.3	6262.9	5943.8	2906.9	3610.1	4164.1	5298	12238.5	11694.4	18178.1	14872.3	13174.1	13984.2	17399.3	15625	14926	17229.4	8237.5	8179.4	8184.5	6588.5	12230.6	11465.5	765.2	2734.7	822.2	1819.7	924.8	7065.7	3717.6	5523.1	789.5	552.9	375.5	361.9	8374.1	7275.3	10746	9285.7	12119.4	8248.8	4243.9	4618.2	1959
OsCESA7	105.5	192.9	523.5	646.4	656.9	203.8	246.1	707.8	348.1	288.1	64.1	90.1	2586	2480.1	803.1	937.5	3462.2	4276.4	7270.6	5860.3	8194.1	7102.7	1918.8	2627.1	2633.9	2549.9	5746.2	4751.1	235.5	124.3	223.9	138.6	546.7	2936.8	1462.5	3790.5	99.5	73.9	26.6	12.6	108.6	108.2	130.3	135.1	127.1	114.4	102.4	101.7	7035.5
OsCESA8	3926.1	2963.8	3849.1	5091.6	2523.3	2901.1	5497.3	6221.4	3138.4	4214.5	5287.6	4970.3	7845.2	8378	13352.5	10595.8	11514.5	11546.1	13263.8	11707.3	12089.5	13188.4	7914.4	8226.1	7533.7	6355.6	9251.5	8263	1201.1	1712.7	1171.8	1373.9	2451.9	8086	5984.8	7909.3	1635.1	544.5	61.7	46.5	931.9	1302	1148.1	1307.2	1165.1	1268.5	2038.7	3350.7	5007.2
OsCESA9	63.8	37.1	111.2	89.2	108.7	63.5	58.9	127.3	204.8	71	62.3	65.4	327	284.6	110.2	150.7	431	497.1	1173.5	996.5	1217.2	1000.2	253.3	298	346.5	302.7	728.8	521.5	39.3	57.1	49.1	70.3	108	332.6	361.3	354.1	43.5	32.8	7	10.9	38.2	53.5	42.8	62.7	77.5	33.7	31.3	72.6	1354.3
OsCESA10	59.8	57.6	54.9	69.7	73	78.8	108.1	90.1	100.1	58.3	55.2	107.2	103	66.5	52.8	62	123.3	139.7	86.8	71.7	107.4	85.6	58.7	75.8	80.5	81.2	75.8	81.2	42.5	65.2	87	90.2	74.5	70.3	64.8	83.5	44.7	19.8	35.5	51.5	48.5	87	62.7	105.9	115.2	82.8	26.8	48.2	113.2
OsCESA11	6	5.6	9.9	7.4	4.4	10	10	22.6	12	11.7	6.4	9.3	27.7	16.5	14	8	14.9	18	16	13.2	48.3	19.1	38.6	31.6	14.9	17.8	8.4	26.1	7.8	8.7	9	23.6	4.2	8.4	8.9	22.3	8.9	23.3	25.1	4.5	8.6	33.3	22.5	13	15.8	18.9	6.7	9.8	6.7
[truncated: 17 more columns]

## Sheet: RiceXPro
OsBAG 1	Young root	Mature root	Mature stem	Old stem	Young leaf blade	Mature leaf blade	Old leaf blade	Young sheath	Mature sheath	Inflorescence 1	Inflorescence 2	Inflorescence 3	Lemma 1	Lemma 2	Lemma 3	Palea 1	Palea 2	Palea 3	Pistil 1	Pistil 2	Pistil 3	Ovary 1	Ovary 2	Ovary 3	Anther 1	Anther 2	Anther 3	Anther 4	Embryo 1	Embryo 2	Embryo 3	Embryo 4	Endosperm 1	Endosperm 2	Endosperm 3	Endosperm 4
Sample 1	19553	1191.4	2771	27978	760.23	271.23	151.79	3924.7	50.32	1100.4	1408.1	1734.6	1959.7	5054.2	399.16	336.75	5526.4	739.06	4402.6	2838.4	3771.2	7335.2	3445.8	3939.9	782.08	2195.4	1863	2386.5	587.53	1514.6	1124.2	365.93	1401.3	1376.6	2088	1182.2
Sample 2	11434	2891.5	10568	26048	384.09	106.44	107.97	2449.4	33.699	1282.8	1777.4	1277.4	1269.7	7376.2	10951	1194.4	4069.5	6652.4	5015.6	2768	3191.3	6352.4	3808.7	6297.2	355.26	2610.1	2117.4	1615.2	1253.5	863.73	755.45	426.03	1402.7	1333.3	1710.4	1265.1
Sample 3	11740	5016.6	10107	6281.9	884.86	113.55	93.643	10788	40.465	1088	1668.9	1281.5	2011.7	6409.5	9280.1	555.27	2758.6	6875.3	1969.5	2894.8	3842.2	3539.2	3696.9	5807	NA	838.38	2758.1	1728.3	1197.2	1090.9	1187.9	325.21	1998	1200.5	1801.9	1086.5
OsBAG 2	Young root	Mature root	Mature stem	Old stem	Young leaf blade	Mature leaf blade	Old leaf blade	Young sheath	Mature sheath	Inflorescence 1	Inflorescence 2	Inflorescence 3	Lemma 1	Lemma 2	Lemma 3	Palea 1	Palea 2	Palea 3	Pistil 1	Pistil 2	Pistil 3	Ovary 1	Ovary 2	Ovary 3	Anther 1	Anther 2	Anther 3	Anther 4	Embryo 1	Embryo 2	Embryo 3	Embryo 4	Endosperm 1	Endosperm 2	Endosperm 3	Endosperm 4
Sample 1	41840	4855.4	3220.7	117330	1295.6	301.87	157.16	11493	36.376	996.81	1753.8	1609.1	2554.7	9269.7	2796.4	66.823	2791.9	5070.5	3442.4	2807.7	4021.7	3506.3	4360.9	2690.5	508.87	1943.8	2328.1	7928.5	685.95	1245.6	875.46	454.63	1080.6	1116.1	2349.5	2106.5
Sample 2	25934	8740.8	44820	139210	555.72	224.24	177.34	4058.1	24.581	1186	1648.2	1656.3	272.27	5797	16621	1682.2	7311.9	9417.2	4658	2889.2	3543.2	2724.6	4069.6	5630	355.21	2634.4	2559.7	4305.4	1308.4	858.22	1256.1	630.24	1087.1	969.6	1971.3	2076
Sample 3	21331	15575	26010	33616	2337.5	184.71	183.11	21644	23.418	921.98	1646.4	1378.6	600.11	5175.8	23350	110.38	1484.8	14802	1527.6	2126.5	2869.5	1849.2	3130.5	3740.8	NA	679.57	2405.2	3285.9	1388.9	959.52	1056.6	493.3	1541.5	960.4	2384.8	1790.1
OsBAG 3	Young root	Mature root	Mature stem	Old stem	Young leaf blade	Mature leaf blade	Old leaf blade	Young sheath	Mature sheath	Inflorescence 1	Inflorescence 2	Inflorescence 3	Lemma 1	Lemma 2	Lemma 3	Palea 1	Palea 2	Palea 3	Pistil 1	Pistil 2	Pistil 3	Ovary 1	Ovary 2	Ovary 3	Anther 1	Anther 2	Anther 3	Anther 4	Embryo 1	Embryo 2	Embryo 3	Embryo 4	Endosperm 1	Endosperm 2	Endosperm 3	Endosperm 4
Sample 1	18517	749.95	1299.6	24558	789.34	467.63	24.402	4316.5	15.374	269.76	400.75	530.47	253.57	1348.1	637.85	89.86	1592.5	1591.2	455.17	316.94	304.01	2972.4	962.17	1718.9	28.896	110.55	119.58	326.88	369.5	430.15	77.807	110.06	732.66	1422.6	584.62	12.892
Sample 2	6633.2	2051.6	7528.5	23568	244.76	88.184	31.824	1781.8	14.559	382.1	630.33	451.87	303.14	1744.5	13506	153.38	921.35	10820	500.35	249.3	303.48	2102	1205	1623.5	52.928	132.58	126.92	236.62	599.16	118.34	52.771	98.736	423.29	1314.5	522.82	20.713
Sample 3	7518.2	3957.4	5678.8	9811.1	1364.1	112.77	25.511	10019	15.464	374.66	649.15	635.02	330.92	1743.5	19385	123.24	821.93	15236	334	547.79	564.29	927.54	1713.5	1170.6	NA	44.493	89.263	82.33	626.19	124	51.09	95.772	372.94	886.74	370.6	14.001
OsBAG 4	Young root	Mature root	Mature stem	Old stem	Young leaf blade	Mature leaf blade	Old leaf blade	Young sheath	Mature sheath	Inflorescence 1	Inflorescence 2	Inflorescence 3	Lemma 1	Lemma 2	Lemma 3	Palea 1	Palea 2	Palea 3	Pistil 1	Pistil 2	Pistil 3	Ovary 1	Ovary 2	Ovary 3	Anther 1	Anther 2	Anther 3	Anther 4	Embryo 1	Embryo 2	Embryo 3	Embryo 4	Endosperm 1	Endosperm 2	Endosperm 3	Endosperm 4
Sample 1	24215	2310.9	13463	115490	11383	10820	5913.3	18967	617.3	18748	24023	30003	5834.7	10070	21290	1151.4	11491	19383	25002	24142	26620	11917	13080	9666.2	11624	11766	12477	10967	8286.9	11172	6470.5	7690.1	3756	2714.4	3112	1449.8
Sample 2	16577	7116.9	34522	131230	12850	8532.5	10779	12035	304.12	14406	33970	23222	3234	14525	87016	5268.8	7592.5	64852	27364	26392	26749	10028	15915	13671	6068.9	14100	11868	9028.8	9512.7	8810	6249.7	7144.1	4145.2	3487.2	3296.9	1883.8
Sample 3	9749.1	8304.4	14635	23335	7699.4	5227.8	7729.8	16333	911.31	18544	26918	26768	4016.6	11671	53971	1010.5	4933.5	39480	27950	18163	20316	5058.3	14580	11870	NA	4862.4	10980	6879.6	9149	8697.1	7878.7	7144.7	5767.2	2990.3	2966.6	1936.3
OsBAG 5	Young root	Mature root	Mature stem	Old stem	Young leaf blade	Mature leaf blade	Old leaf blade	Young sheath	Mature sheath	Inflorescence 1	Inflorescence 2	Inflorescence 3	Lemma 1	Lemma 2	Lemma 3	Palea 1	Palea 2	Palea 3	Pistil 1	Pistil 2	Pistil 3	Ovary 1	Ovary 2	Ovary 3	Anther 1	Anther 2	Anther 3	Anther 4	Embryo 1	Embryo 2	Embryo 3	Embryo 4	Endosperm 1	Endosperm 2	Endosperm 3	Endosperm 4
Sample 1	1151.3	113.62	1251.8	1724.3	631.76	1322.6	423.47	1088.9	97.988	419.25	634.36	948.01	666.2	1335.1	1863.1	372.69	2183.8	1521.8	1107.1	786.39	1493.3	4718.7	1033.4	914.32	541.53	1389.3	451.1	637.79	1820	1419.3	1027.1	1447.9	1986.1	1241.4	1437.7	789.77
Sample 2	461.22	332.53	1354.4	1547.9	262.94	329.28	300.27	1907.6	38.906	579.76	916.38	509.19	1037.8	2456.9	1104.2	636.81	1180.5	593.72	1282.4	1165.3	2060.8	6181.2	1294	1151.3	214.71	1743.3	646.98	359.13	1615.4	847.71	581.61	1255.9	1908.5	1358	1368.2	846.92
Sample 3	227.32	302.53	1204.7	895.44	319.37	275.84	305.49	1278.1	178.13	480.35	822.93	645.11	1039.4	1091.7	1047	336.82	425.2	637.34	1133.2	1317	1401.4	800.64	1022	944.81	NA	255.27	547.7	382.85	1369.1	659.79	1027.2	1082.8	1834.4	1246.5	1082.3	784.55
OsBAG 6	Young root	Mature root	Mature stem	Old stem	Young leaf blade	Mature leaf blade	Old leaf blade	Young sheath	Mature sheath	Inflorescence 1	Inflorescence 2	Inflorescence 3	Lemma 1	Lemma 2	Lemma 3	Palea 1	Palea 2	Palea 3	Pistil 1	Pistil 2	Pistil 3	Ovary 1	Ovary 2	Ovary 3	Anther 1	Anther 2	Anther 3	Anther 4	Embryo 1	Embryo 2	Embryo 3	Embryo 4	Endosperm 1	Endosperm 2	Endosperm 3	Endosperm 4
Sample 1	2596.1	166.04	678.91	66.361	52.874	21.489	120.69	263.11	5.6944	50.39	31.504	113.29	355.59	46.33	584.79	74.685	944.49	790.21	199.17	195.5	401.03	68125	187.97	1324.6	2627.9	3211.4	6461.5	1817.3	2993.1	525.75	232.61	1530.1	10097	815.04	801.74	633.42
Sample 2	1612.8	380.74	221.85	177.42	113.26	15.737	71.75	577.12	1.9726	29.559	32.3	19.667	414.22	802.42	53.274	202.95	106.12	56.948	543.65	206.9	338.15	197670	230.81	2357.3	1317.5	2005.1	7547	405.45	2277.3	186.15	108.59	794.53	5772.2	1204.7	604.9	658.45
Sample 3	639.52	302.99	82.689	36.053	36.363	12.772	57.111	175.89	10.163	9.8947	28.447	30.996	809.26	2752.2	35.403	286.52	1170	58.372	340.1	77.101	57.769	41526	136.88	1294.9	NA	141.3	13269	11342	231.37	108.04	282.27	764.41	2750.3	1300.9	975.45	765.75
