# Supplementary material for: The Divergent Roles of the Rice bcl-2 Associated Athanogene (BAG) Genes in Plant Development and Environmental Responses
Source: Plants (Basel). 2021 Oct 13;10(10):2169. doi: 10.3390/plants10102169 (PMC8538510; doi:10.3390/plants10102169)
Supplement: Supplementary file 1 [file plants-10-02169-s001.zip › Additional File S3. Primers used in this study.xlsx]

## Sheet: Sheet1
Additional file 3. Summary of primer used in this study
Gene name	Primer sequence
ACTIN	F: GAGTATGATGAGTCGGGTCCAG; R: ACACCAACAATCCCAAACAGAG
OsBAG1	F: CACCAAGGTGACGGCTCT; R: GTCCAGCGACTCCACGTACT
OsBAG2	F: GAGGCGATCGTGAGCAAG; R: GTACTTCTGCACCCGCTTCT
OsBAG3	F: AGAGGCGGCTACAGGTGAA; R: CTGCTGATGGTGTTGGTGAG
OsBAG4	F: GGCCGTGTAAGAGCTGAAGT; R: CGTACCTCAGCCTTCCTTTG
OsBAG5	F: GCAGCATCCAGATTCCAGA; R: AAGAAGTGGGAGGTGGAGGT
OsBAG6	F: TACCGGAGGAGGGTAACCA; R: GCGTCATCATGTCCTCCTG
