# Supplementary material for: The Divergent Roles of the Rice bcl-2 Associated Athanogene (BAG) Genes in Plant Development and Environmental Responses
Source: Plants (Basel). 2021 Oct 13;10(10):2169. doi: 10.3390/plants10102169 (PMC8538510; doi:10.3390/plants10102169)
Supplement: Supplementary file 1 [file plants-10-02169-s001.zip › Additional File S4. Subcellular locations of OsBAGs.xlsx]

## Sheet: rice
Location Predictors
Gene	Chromosome	Winner Takes All	Location BaCelLo	Location MultiLoc2	Location Plant-mPLoc	Location PProwler 1.2	Location WoLF PSORT	Location YLoc	Predotar in detail
OsBAG1	9	mitochondrion	nucleus	cytosol	nucleus	mitochondrion	plastid(chloroplast)	cytosol	mitochondrion
OsBAG2	8	cytosol, nucleus	nucleus	cytosol	nucleus	mitochondrion	cytosol	cytosol	/
OsBAG3	6	nucleus	nucleus	cytosol	nucleus	mitochondrion	nucleus	cytosol	/
OsBAG4	1	cytosol, nucleus	nucleus	cytosol	nucleus	mitochondrion	cytosol	cytosol	/
OsBAG5	2	cytosol, nucleus	nucleus	cytosol	nucleus,plastid	mitochondrion	cytosol	cytosol	/
OsBAG6	11	nucleus	nucleus	nucleus	nucleus	mitochondrion	cytosol	cytosol	/
The following Table is from Rana et al. 2012
