# Supplementary material for: The Divergent Roles of the Rice bcl-2 Associated Athanogene (BAG) Genes in Plant Development and Environmental Responses
Source: Plants (Basel). 2021 Oct 13;10(10):2169. doi: 10.3390/plants10102169 (PMC8538510; doi:10.3390/plants10102169)
Supplement: Supplementary file 1 [file plants-10-02169-s001.zip › Additional File S6. Details of the 10 putative motifs.xlsx]

## Sheet: file5
Additional file 6. Details of the 10 putative motifs
MOTIF	WIDTH	BEST POSSIBLE MATCH
1	113	PVPTIRVKVKYNGVYHEIYINSQASFGELKKLLSAKTGLHPDDQKVVYKDKERDSKAFLDMAGVKDRSKMVLLEDPTAQAKRLLEERRNGKAERAAKSVSRVSLDVDKLASKV
2	64	LEAIVGKGGKVVDADVVVLTELLMNELLKLDAIAADGEVKAQRRLQEKRVQKYVETLDAIRAKN
3	13	WEVRPGGMLVQKR
4	21	WESFDLLSSLPSTSSASVTTT
5	11	SPQPRTDWELF
6	7	SQRRFFG
7	8	WEPFDNGM
8	8	LDAVPGYY
9	8	CERMAKQC
10	10	EKGTGKQDHH
