# Supplementary material for: The Divergent Roles of the Rice bcl-2 Associated Athanogene (BAG) Genes in Plant Development and Environmental Responses
Source: Plants (Basel). 2021 Oct 13;10(10):2169. doi: 10.3390/plants10102169 (PMC8538510; doi:10.3390/plants10102169)
Supplement: Supplementary file 1 [file plants-10-02169-s001.zip › Additional File S8. Top 100 co-expressed genes of the OsBAGs and OsCESAs.xlsx]

## Sheet: OsBAG1 co-expresstion top 100
NO	Probeset1	Probeset2	Correlation	Probeset2 Annotaion
1	Os.51065.1.S1_at	Os.51065.1.S1_at	1	LOC_Os09g35630 // protein binding protein, putative, expressed
2	Os.51065.1.S1_at	Os.37660.1.S1_at	0.818838	LOC_Os04g54870 // RNA recognition motif containing protein, putative, expressed
3	Os.51065.1.S1_at	Os.12399.1.S1_at	0.81513	LOC_Os09g32080 // endochitinase A2 precursor, putative, expressed
4	Os.51065.1.S1_at	OsAffx.31542.1.S1_x_at	0.806066	LOC_Os12g01740 // BRASSINOSTEROID INSENSITIVE 1-associated receptor kinase 1 precursor, putative, expressed
5	Os.51065.1.S1_at	Os.9211.1.S1_at	0.802249	LOC_Os07g45060 // GPI-anchored protein At5g19240 precursor, putative, expressed
6	Os.51065.1.S1_at	Os.51291.1.S1_at	0.789349	LOC_Os02g13980 // expressed protein
7	Os.51065.1.S1_at	Os.12288.1.S1_at	0.788977	LOC_Os08g13920 // xyloglucan endotransglycosylase/hydrolase protein 8 precursor, putative, expressed
8	Os.51065.1.S1_at	Os.49701.1.S1_at	0.784589	LOC_Os04g33990 // VAMP protein SEC22, putative, expressed
9	Os.51065.1.S1_at	Os.37660.1.S2_at	0.783563	LOC_Os04g54870 // RNA recognition motif containing protein, putative, expressed
10	Os.51065.1.S1_at	Os.5987.1.S1_at	0.782039	LOC_Os05g32500 // expressed protein
11	Os.51065.1.S1_at	Os.10179.1.S1_at	0.775468	LOC_Os06g03640 // protein binding protein, putative, expressed
12	Os.51065.1.S1_at	Os.162.1.S1_at	0.774867	LOC_Os05g20050 // ras-related protein RGP2, putative, expressed
13	Os.51065.1.S1_at	Os.5746.1.S1_at	0.772308	LOC_Os03g56380 // ankyrin-like protein, putative, expressed
14	Os.51065.1.S1_at	Os.23225.1.A1_at	0.760678	LOC_Os09g20880 // ATP binding protein, putative, expressed
15	Os.51065.1.S1_at	Os.12392.1.S1_at	0.76008	LOC_Os03g59210 // expressed protein
16	Os.51065.1.S1_at	Os.9514.1.S1_at	0.758521	LOC_Os05g04820 // MYB2, putative, expressed
17	Os.51065.1.S1_at	Os.26531.1.S1_s_at	0.75683	LOC_Os02g06840 // beta-1,3-galactosyltransferase sqv-2, putative, expressed
18	Os.51065.1.S1_at	Os.6829.1.S1_at	0.756038	LOC_Os11g01740 // BRASSINOSTEROID INSENSITIVE 1-associated receptor kinase 1 precursor, putative, expressed
19	Os.51065.1.S1_at	Os.9709.2.S1_at	0.755982	LOC_Os08g06380 // CSLF6 - cellulose synthase-like family F; beta1,3;1,4 glucan synthase, expressed
20	Os.51065.1.S1_at	Os.14525.1.S1_at	0.755588	LOC_Os07g44090 // myb-related protein Hv33, putative, expressed
21	Os.51065.1.S1_at	Os.50276.1.S1_at	0.755013	LOC_Os05g50510 // O-acetyltransferase, putative, expressed
22	Os.51065.1.S1_at	Os.12769.1.S1_at	0.753765	N/A // N/A
23	Os.51065.1.S1_at	Os.48521.1.S1_at	0.748782	LOC_Os04g24430 // sucrose synthase 2, putative, expressed
24	Os.51065.1.S1_at	Os.24249.1.A1_at	0.747414	LOC_Os12g41690 // plant integral membrane protein TIGR01569 containing protein, expressed
25	Os.51065.1.S1_at	Os.49544.1.S1_at	0.74741	LOC_Os09g07350 // fasciclin-like arabinogalactan protein 8 precursor, putative, expressed
26	Os.51065.1.S1_at	Os.35365.1.S1_at	0.746581	LOC_Os06g30950 // integral membrane protein like, putative, expressed
27	Os.51065.1.S1_at	Os.54620.1.A1_at	0.74642	LOC_Os12g38810 // expressed protein
28	Os.51065.1.S1_at	Os.22590.1.A1_at	0.743385	N/A // N/A
29	Os.51065.1.S1_at	Os.11586.1.S1_at	0.742948	LOC_Os06g49320 // glycosyltransferase, putative, expressed
30	Os.51065.1.S1_at	Os.10701.1.S1_at	0.742585	LOC_Os03g52630 // endo-1,4-beta-glucanase Cel1, putative, expressed
31	Os.51065.1.S1_at	Os.8555.1.S1_at	0.742261	LOC_Os05g06720 // esterase precursor, putative, expressed
32	Os.51065.1.S1_at	Os.27550.1.S1_at	0.741176	LOC_Os07g06680 // fasciclin domain, putative, expressed
33	Os.51065.1.S1_at	Os.27465.1.S1_at	0.736326	LOC_Os03g18890 // transferase, transferring glycosyl groups, putative, expressed
34	Os.51065.1.S1_at	Os.5902.1.S2_at	0.73552	LOC_Os04g47180 // expressed protein
35	Os.51065.1.S1_at	Os.10525.1.S1_at	0.734133	LOC_Os10g12750 // expressed protein
36	Os.51065.1.S1_at	Os.49509.1.S1_at	0.73378	LOC_Os08g44620 // expressed protein
37	Os.51065.1.S1_at	Os.4370.2.S1_x_at	0.732687	LOC_Os06g06780 // harpin-induced protein, putative, expressed
38	Os.51065.1.S1_at	Os.9684.1.S1_at	0.731154	LOC_Os06g38960 // expressed protein
39	Os.51065.1.S1_at	Os.1652.1.S1_at	0.729572	LOC_Os01g02139 // expressed protein
40	Os.51065.1.S1_at	Os.10176.1.S1_at	0.729252	LOC_Os07g10770 // CESA8 - cellulose synthase, expressed
41	Os.51065.1.S1_at	Os.25562.1.S1_at	0.729017	LOC_Os05g48270 // dopamine beta-monooxygenase, putative, expressed
42	Os.51065.1.S1_at	Os.50750.1.S1_at	0.728972	LOC_Os03g02190 // receptor protein kinase CRINKLY4 precursor, putative, expressed
43	Os.51065.1.S1_at	OsAffx.5283.1.S1_at	0.728946	LOC_Os07g10440 // expressed protein
44	Os.51065.1.S1_at	Os.54857.1.S1_at	0.728672	LOC_Os02g56750 // ATPP2-B1, putative, expressed
45	Os.51065.1.S1_at	Os.7609.1.S1_at	0.726392	LOC_Os05g32110 // COBRA-like protein 4 precursor, putative, expressed
46	Os.51065.1.S1_at	Os.8562.1.S1_x_at	0.726302	LOC_Os11g02070 // TD and POZ domain-containing protein 2, putative, expressed
47	Os.51065.1.S1_at	Os.8597.1.S1_at	0.726237	LOC_Os03g02040 // remorin, putative, expressed
48	Os.51065.1.S1_at	Os.14570.1.S1_at	0.723083	LOC_Os05g46200 // beta-galactosidase precursor, putative, expressed
49	Os.51065.1.S1_at	Os.49369.1.S1_at	0.723016	LOC_Os06g42800 // ATP binding protein, putative, expressed
50	Os.51065.1.S1_at	Os.11691.1.S1_at	0.722288	LOC_Os05g35200 // secondary cell wall-related glycosyltransferase family 8, putative, expressed
51	Os.51065.1.S1_at	Os.10183.1.S2_at	0.720826	LOC_Os05g08370 // CESA1 - cellulose synthase, expressed
52	Os.51065.1.S1_at	Os.8688.1.S1_a_at	0.719529	LOC_Os07g26440 // CIP7, putative, expressed
53	Os.51065.1.S1_at	OsAffx.7879.1.S1_at	0.71836	LOC_Os12g43510 // expressed protein
54	Os.51065.1.S1_at	Os.5908.1.S1_at	0.718261	LOC_Os01g47780 // fasciclin-like arabinogalactan protein 7 precursor, putative, expressed
55	Os.51065.1.S1_at	Os.52940.1.S1_at	0.717413	LOC_Os12g05600 // catalytic/ hydrolase, putative, expressed
56	Os.51065.1.S1_at	Os.4857.1.S1_at	0.715676	LOC_Os03g62090 // CESA5 - cellulose synthase, expressed
57	Os.51065.1.S1_at	Os.50969.1.S1_at	0.715304	LOC_Os03g46150 // protease inhibitor/seed storage/LTP family protein, expressed
58	Os.51065.1.S1_at	Os.16088.1.S1_x_at	0.715222	LOC_Os07g48420 // expressed protein
59	Os.51065.1.S1_at	Os.1437.1.S1_at	0.714902	LOC_Os01g06580 // fasciclin-like arabinogalactan protein 7 precursor, putative, expressed
60	Os.51065.1.S1_at	Os.8562.1.S1_a_at	0.714311	LOC_Os11g02070 // TD and POZ domain-containing protein 2, putative, expressed
61	Os.51065.1.S1_at	Os.10428.1.S1_at	0.713547	LOC_Os02g14170 // peroxidase precursor, putative, expressed
62	Os.51065.1.S1_at	Os.14667.2.S1_at	0.71252	LOC_Os05g38250 // expressed protein
63	Os.51065.1.S1_at	Os.50014.1.S1_at	0.711242	LOC_Os03g38050 // beta-1,3-galactosyltransferase sqv-2, putative, expressed
64	Os.51065.1.S1_at	Os.12990.1.S1_x_at	0.710458	LOC_Os03g50970 // retrotransposon protein, putative, Ty1-copia subclass, expressed
65	Os.51065.1.S1_at	Os.23248.1.A1_at	0.710355	LOC_Os04g46560 // malate dehydrogenase, cytoplasmic, putative, expressed
66	Os.51065.1.S1_at	Os.1726.1.S1_at	0.710314	LOC_Os01g18240 // MYB2, putative, expressed
67	Os.51065.1.S1_at	Os.10576.1.S1_at	0.709951	LOC_Os02g33550 // VAMP protein SEC22, putative, expressed
68	Os.51065.1.S1_at	Os.9605.1.S1_at	0.709378	LOC_Os03g64230 // expressed protein
69	Os.51065.1.S1_at	Os.54424.1.S1_at	0.708375	LOC_Os01g42200 // expressed protein
70	Os.51065.1.S1_at	Os.49512.1.S1_s_at	0.708197	LOC_Os05g48600 // galactosylgalactosylxylosylprotein 3-beta-glucuronosyltransferase 1, putative, expressed
71	Os.51065.1.S1_at	Os.24786.1.S1_s_at	0.707386	LOC_Os04g48870 // nitrilase-associated protein, putative, expressed
72	Os.51065.1.S1_at	Os.12742.1.A1_at	0.706451	LOC_Os11g36340 // lymphoid organ expressed yellow head virus receptor protein, putative, expressed
73	Os.51065.1.S1_at	Os.12880.1.S1_s_at	0.705588	LOC_Os12g43510 // expressed protein
74	Os.51065.1.S1_at	Os.11677.1.S1_x_at	0.704164	LOC_Os05g03190 // IQD1, putative, expressed
75	Os.51065.1.S1_at	Os.10287.1.S1_at	0.704068	LOC_Os07g01370 // peroxidase 1 precursor, putative, expressed
76	Os.51065.1.S1_at	Os.57.1.S1_at	0.704064	LOC_Os01g14880 // hypothetical protein
77	Os.51065.1.S1_at	OsAffx.23081.1.S1_at	0.704005	N/A // N/A
78	Os.51065.1.S1_at	Os.8475.2.S1_at	0.703599	LOC_Os08g38170 // GMP synthase, putative, expressed
79	Os.51065.1.S1_at	Os.50969.1.S1_x_at	0.703218	LOC_Os03g46150 // protease inhibitor/seed storage/LTP family protein, expressed
80	Os.51065.1.S1_at	OsAffx.9099.1.S1_x_at	0.702116	LOC_Os01g44130 // aspartic proteinase oryzasin-1 precursor, putative, expressed
81	Os.51065.1.S1_at	Os.23252.1.S1_at	0.701642	LOC_Os10g40620 // expressed protein
82	Os.51065.1.S1_at	Os.11677.2.S1_at	0.701289	LOC_Os05g03190 // IQD1, putative, expressed
83	Os.51065.1.S1_at	Os.49099.1.S1_at	0.699862	LOC_Os03g63760 // xyloglucan endotransglucosylase/hydrolase protein 30 precursor, putative, expressed
84	Os.51065.1.S1_at	Os.7916.1.S1_at	0.699418	LOC_Os01g59150 // tubulin beta-4 chain, putative, expressed
85	Os.51065.1.S1_at	Os.37728.1.S1_x_at	0.699405	LOC_Os08g38170 // GMP synthase, putative, expressed
86	Os.51065.1.S1_at	Os.57130.1.S1_at	0.699307	LOC_Os06g46754 // RIC10, putative, expressed
87	Os.51065.1.S1_at	Os.18700.1.S1_at	0.699147	LOC_Os07g05470 // AIR9, putative, expressed
88	Os.51065.1.S1_at	Os.8562.2.S1_x_at	0.697895	LOC_Os12g02030 // TD and POZ domain-containing protein 2, putative, expressed
89	Os.51065.1.S1_at	Os.55458.1.S1_at	0.697717	LOC_Os03g20760 // lipid binding protein, putative, expressed
90	Os.51065.1.S1_at	Os.52543.1.S1_at	0.697462	LOC_Os04g53580 // RIC10, putative, expressed
91	Os.51065.1.S1_at	Os.9544.1.A1_at	0.696431	LOC_Os07g07920 // lipid binding protein, putative, expressed
92	Os.51065.1.S1_at	Os.5500.1.S1_s_at	0.695259	LOC_Os08g23180 // fasciclin-like arabinogalactan protein 8 precursor, putative, expressed
93	Os.51065.1.S1_at	Os.48938.1.A1_at	0.694826	N/A // N/A
94	Os.51065.1.S1_at	Os.55222.1.S1_at	0.694783	LOC_Os09g27160 // expressed protein
95	Os.51065.1.S1_at	Os.52641.1.S1_at	0.694353	LOC_Os09g30486 // fasciclin-like arabinogalactan protein 7 precursor, putative, expressed
96	Os.51065.1.S1_at	Os.10178.1.S1_a_at	0.694001	LOC_Os07g24190 // CESA3 - cellulose synthase, expressed
97	Os.51065.1.S1_at	Os.20437.1.S1_at	0.693179	LOC_Os01g40550 // hsp20/alpha crystallin family protein, expressed
98	Os.51065.1.S1_at	Os.4370.1.S1_at	0.693061	LOC_Os06g06780 // harpin-induced protein, putative, expressed
99	Os.51065.1.S1_at	Os.6019.1.S1_at	0.692537	LOC_Os11g01570 // expressed protein
100	Os.51065.1.S1_at	Os.20580.1.S1_at	0.691956	LOC_Os02g55870 // heparanase-like protein 3 precursor, putative, expressed

## Sheet: OsBAG3 co-expresstion top 100
NO	Probeset1	Probeset2	Correlation	Probeset2 Annotaion
1	Os.10179.1.S1_at	Os.10179.1.S1_at	1	LOC_Os06g03640 // protein binding protein, putative, expressed
2	Os.10179.1.S1_at	Os.49544.1.S1_at	0.92962	LOC_Os09g07350 // fasciclin-like arabinogalactan protein 8 precursor, putative, expressed
3	Os.10179.1.S1_at	Os.9709.2.S1_at	0.921613	LOC_Os08g06380 // CSLF6 - cellulose synthase-like family F; beta1,3;1,4 glucan synthase, expressed
4	Os.10179.1.S1_at	Os.5987.1.S1_at	0.91648	LOC_Os05g32500 // expressed protein
5	Os.10179.1.S1_at	Os.14525.1.S1_at	0.905525	LOC_Os07g44090 // myb-related protein Hv33, putative, expressed
6	Os.10179.1.S1_at	Os.12399.1.S1_at	0.902949	LOC_Os09g32080 // endochitinase A2 precursor, putative, expressed
7	Os.10179.1.S1_at	Os.10176.1.S1_at	0.894358	LOC_Os07g10770 // CESA8 - cellulose synthase, expressed
8	Os.10179.1.S1_at	Os.49701.1.S1_at	0.891868	LOC_Os04g33990 // VAMP protein SEC22, putative, expressed
9	Os.10179.1.S1_at	Os.7609.1.S1_at	0.887354	LOC_Os05g32110 // COBRA-like protein 4 precursor, putative, expressed
10	Os.10179.1.S1_at	Os.9514.1.S1_at	0.880702	LOC_Os05g04820 // MYB2, putative, expressed
11	Os.10179.1.S1_at	Os.12990.1.S1_x_at	0.87991	LOC_Os03g50970 // retrotransposon protein, putative, Ty1-copia subclass, expressed
12	Os.10179.1.S1_at	Os.20580.1.S1_at	0.876961	LOC_Os02g55870 // heparanase-like protein 3 precursor, putative, expressed
13	Os.10179.1.S1_at	Os.5908.1.S1_at	0.866149	LOC_Os01g47780 // fasciclin-like arabinogalactan protein 7 precursor, putative, expressed
14	Os.10179.1.S1_at	Os.10576.1.S1_at	0.862198	LOC_Os02g33550 // VAMP protein SEC22, putative, expressed
15	Os.10179.1.S1_at	Os.10287.1.S1_at	0.861535	LOC_Os07g01370 // peroxidase 1 precursor, putative, expressed
16	Os.10179.1.S1_at	Os.50014.1.S1_at	0.86129	LOC_Os03g38050 // beta-1,3-galactosyltransferase sqv-2, putative, expressed
17	Os.10179.1.S1_at	Os.50276.1.S1_at	0.859657	LOC_Os05g50510 // O-acetyltransferase, putative, expressed
18	Os.10179.1.S1_at	Os.52641.1.S1_at	0.854856	LOC_Os09g30486 // fasciclin-like arabinogalactan protein 7 precursor, putative, expressed
19	Os.10179.1.S1_at	Os.5843.1.S1_at	0.851739	LOC_Os06g46799 // peroxidase 39 precursor, putative, expressed
20	Os.10179.1.S1_at	Os.10183.1.S2_at	0.851217	LOC_Os05g08370 // CESA1 - cellulose synthase, expressed
21	Os.10179.1.S1_at	Os.51291.1.S1_at	0.849885	LOC_Os02g13980 // expressed protein
22	Os.10179.1.S1_at	Os.23225.1.A1_at	0.849277	LOC_Os09g20880 // ATP binding protein, putative, expressed
23	Os.10179.1.S1_at	Os.4835.1.S1_at	0.848756	LOC_Os04g31520 // expressed protein
24	Os.10179.1.S1_at	Os.162.1.S1_at	0.846869	LOC_Os05g20050 // ras-related protein RGP2, putative, expressed
25	Os.10179.1.S1_at	Os.47625.1.A1_s_at	0.846245	LOC_Os05g04500 // peroxidase 63 precursor, putative, expressed
26	Os.10179.1.S1_at	Os.6019.1.S1_at	0.845638	LOC_Os11g01570 // expressed protein
27	Os.10179.1.S1_at	Os.11677.2.S1_at	0.843987	LOC_Os05g03190 // IQD1, putative, expressed
28	Os.10179.1.S1_at	Os.8555.1.S1_at	0.842212	LOC_Os05g06720 // esterase precursor, putative, expressed
29	Os.10179.1.S1_at	Os.8247.1.S1_at	0.840266	LOC_Os03g51150 // expressed protein
30	Os.10179.1.S1_at	Os.18648.1.S1_at	0.838898	N/A // N/A
31	Os.10179.1.S1_at	Os.22241.1.S1_s_at	0.837442	LOC_Os11g41150 // SPR1, putative, expressed
32	Os.10179.1.S1_at	Os.9719.1.S1_at	0.83723	N/A // N/A
33	Os.10179.1.S1_at	Os.52598.1.S1_at	0.837096	LOC_Os07g07340 // glucan endo-1,3-beta-glucosidase 5 precursor, putative, expressed
34	Os.10179.1.S1_at	Os.14232.1.S1_at	0.837026	LOC_Os01g46120 // esterase precursor, putative, expressed
35	Os.10179.1.S1_at	Os.329.1.S1_at	0.835875	LOC_Os04g55670 // glycosyltransferase, putative, expressed
36	Os.10179.1.S1_at	Os.5881.1.S1_at	0.83586	LOC_Os05g19030 // expressed protein
37	Os.10179.1.S1_at	Os.20262.1.S1_at	0.835824	LOC_Os05g03174 // glycosyltransferase, putative, expressed
38	Os.10179.1.S1_at	Os.9231.1.S1_at	0.835467	LOC_Os04g01300 // transmembrane protein 115, putative, expressed
39	Os.10179.1.S1_at	Os.11677.1.S1_x_at	0.833883	LOC_Os05g03190 // IQD1, putative, expressed
40	Os.10179.1.S1_at	Os.12288.1.S1_at	0.831197	LOC_Os08g13920 // xyloglucan endotransglycosylase/hydrolase protein 8 precursor, putative, expressed
41	Os.10179.1.S1_at	Os.9835.1.S1_a_at	0.829225	LOC_Os01g62020 // UDP-glucuronic acid decarboxylase 1, putative, expressed
42	Os.10179.1.S1_at	Os.153.1.S1_at	0.829022	LOC_Os05g41990 // peroxidase 1 precursor, putative, expressed
43	Os.10179.1.S1_at	Os.11586.1.S1_at	0.82774	LOC_Os06g49320 // glycosyltransferase, putative, expressed
44	Os.10179.1.S1_at	Os.15918.1.S1_x_at	0.827606	LOC_Os03g63060 // wiscott-Aldrich syndrome, C-terminal, putative, expressed
45	Os.10179.1.S1_at	Os.1726.1.S1_at	0.827488	LOC_Os01g18240 // MYB2, putative, expressed
46	Os.10179.1.S1_at	Os.6247.1.S1_at	0.827406	LOC_Os09g36350 // endoglucanase 1 precursor, putative, expressed
47	Os.10179.1.S1_at	Os.12392.1.S1_at	0.826328	LOC_Os03g59210 // expressed protein
48	Os.10179.1.S1_at	OsAffx.4639.1.S1_at	0.826209	LOC_Os05g46610 // myb-related protein Hv33, putative, expressed
49	Os.10179.1.S1_at	Os.9015.1.S1_at	0.825531	LOC_Os01g73980 // xylem cysteine proteinase 2 precursor, putative, expressed
50	Os.10179.1.S1_at	Os.53704.1.S1_x_at	0.825528	LOC_Os05g48900 // fasciclin-like arabinogalactan protein 7 precursor, putative, expressed
51	Os.10179.1.S1_at	Os.7758.1.S1_at	0.82521	LOC_Os02g10480 // GTPase activating protein, putative, expressed
52	Os.10179.1.S1_at	Os.10178.1.S1_a_at	0.825174	LOC_Os07g24190 // CESA3 - cellulose synthase, expressed
53	Os.10179.1.S1_at	Os.5832.1.S1_at	0.823634	LOC_Os01g64490 // ATP binding protein, putative, expressed
54	Os.10179.1.S1_at	Os.28002.1.S1_at	0.823422	LOC_Os08g35710 // expressed protein
55	Os.10179.1.S1_at	Os.4370.2.S1_x_at	0.823306	LOC_Os06g06780 // harpin-induced protein, putative, expressed
56	Os.10179.1.S1_at	Os.54620.1.A1_at	0.822761	LOC_Os12g38810 // expressed protein
57	Os.10179.1.S1_at	Os.5746.1.S1_at	0.821985	LOC_Os03g56380 // ankyrin-like protein, putative, expressed
58	Os.10179.1.S1_at	OsAffx.28851.1.S1_s_at	0.819077	LOC_Os07g41050 // VEP1, putative, expressed
59	Os.10179.1.S1_at	Os.25562.1.S1_at	0.818552	LOC_Os05g48270 // dopamine beta-monooxygenase, putative, expressed
60	Os.10179.1.S1_at	OsAffx.14314.1.S1_x_at	0.818336	LOC_Os04g47520 // auxin-independent growth promoter, putative, expressed
61	Os.10179.1.S1_at	OsAffx.19841.1.S1_at	0.818322	LOC_Os12g26880 // uclacyanin-2 precursor, putative, expressed
62	Os.10179.1.S1_at	Os.23248.1.A1_at	0.817636	LOC_Os04g46560 // malate dehydrogenase, cytoplasmic, putative, expressed
63	Os.10179.1.S1_at	Os.10473.1.S1_at	0.816889	LOC_Os12g25690 // UDP-glucose 6-dehydrogenase, putative, expressed
64	Os.10179.1.S1_at	Os.8597.1.S1_at	0.816561	LOC_Os03g02040 // remorin, putative, expressed
65	Os.10179.1.S1_at	Os.12751.1.S1_at	0.815656	LOC_Os02g48470 // expressed protein
66	Os.10179.1.S1_at	Os.7098.1.S1_at	0.814583	LOC_Os05g01810 // xylem cysteine proteinase 2 precursor, putative, expressed
67	Os.10179.1.S1_at	Os.35365.1.S1_at	0.813955	LOC_Os06g30950 // integral membrane protein like, putative, expressed
68	Os.10179.1.S1_at	Os.10701.1.S1_at	0.810588	LOC_Os03g52630 // endo-1,4-beta-glucanase Cel1, putative, expressed
69	Os.10179.1.S1_at	Os.7594.1.S1_at	0.810432	LOC_Os05g42000 // peroxidase 1 precursor, putative, expressed
70	Os.10179.1.S1_at	OsAffx.16707.1.S1_at	0.810063	LOC_Os07g44090 // myb-related protein Hv33, putative, expressed
71	Os.10179.1.S1_at	Os.56169.1.S1_at	0.809756	LOC_Os03g36530 // FAD binding domain containing protein, putative, expressed
72	Os.10179.1.S1_at	OsAffx.22754.1.S1_s_at	0.809491	LOC_Os01g07410 // axi 1 protein, putative, expressed
73	Os.10179.1.S1_at	Os.9178.1.S1_at	0.808406	LOC_Os11g07670 // disease resistance response protein 206, putative, expressed
74	Os.10179.1.S1_at	Os.1437.1.S1_at	0.808303	LOC_Os01g06580 // fasciclin-like arabinogalactan protein 7 precursor, putative, expressed
75	Os.10179.1.S1_at	Os.1678.1.S1_at	0.808021	LOC_Os01g07420 // hydrolase, putative, expressed
76	Os.10179.1.S1_at	Os.28036.1.S1_x_at	0.804442	LOC_Os03g45340 // small heat shock-like protein, putative, expressed
77	Os.10179.1.S1_at	Os.4619.1.S1_at	0.803723	N/A // N/A
78	Os.10179.1.S1_at	Os.5927.1.S1_at	0.803492	LOC_Os03g63540 // expressed in cucumber hypocotyls, putative, expressed
79	Os.10179.1.S1_at	Os.51533.1.S1_at	0.803462	LOC_Os06g34650 // RING-H2 finger protein ATL2L, putative, expressed
80	Os.10179.1.S1_at	Os.37660.1.S2_at	0.802876	LOC_Os04g54870 // RNA recognition motif containing protein, putative, expressed
81	Os.10179.1.S1_at	Os.8562.1.S1_x_at	0.802857	LOC_Os11g02070 // TD and POZ domain-containing protein 2, putative, expressed
82	Os.10179.1.S1_at	OsAffx.4214.1.S1_x_at	0.801395	LOC_Os04g59330 // expressed protein
83	Os.10179.1.S1_at	Os.50750.1.S1_at	0.800424	LOC_Os03g02190 // receptor protein kinase CRINKLY4 precursor, putative, expressed
84	Os.10179.1.S1_at	Os.51383.1.S1_at	0.800268	LOC_Os07g40910 // expressed protein
85	Os.10179.1.S1_at	Os.50054.1.S1_x_at	0.799971	LOC_Os06g04090 // NAM protein, putative, expressed
86	Os.10179.1.S1_at	Os.10178.2.S1_a_at	0.799564	LOC_Os07g24190 // CESA3 - cellulose synthase, expressed
87	Os.10179.1.S1_at	Os.18736.1.S1_at	0.799332	LOC_Os01g70200 // secondary cell wall-related glycosyltransferase family 47, putative, expressed
88	Os.10179.1.S1_at	Os.27703.1.S1_s_at	0.798324	LOC_Os09g13650 // expressed protein
89	Os.10179.1.S1_at	Os.37225.1.S1_at	0.797997	LOC_Os07g27810 // fiber protein Fb34, putative, expressed
90	Os.10179.1.S1_at	Os.49509.1.S1_at	0.794952	LOC_Os08g44620 // expressed protein
91	Os.10179.1.S1_at	Os.52940.1.S1_at	0.794808	LOC_Os12g05600 // catalytic/ hydrolase, putative, expressed
92	Os.10179.1.S1_at	Os.54853.1.S1_at	0.79148	N/A // N/A
93	Os.10179.1.S1_at	Os.22590.1.A1_at	0.79073	N/A // N/A
94	Os.10179.1.S1_at	Os.52482.1.S1_at	0.790528	LOC_Os07g36630 // CSLF8 - cellulose synthase-like family F; beta1,3;1,4 glucan synthase, expressed
95	Os.10179.1.S1_at	Os.12965.1.S1_at	0.790232	LOC_Os09g25290 // DNA-3-methyladenine glycosylase I, putative, expressed
96	Os.10179.1.S1_at	Os.18630.1.S1_at	0.790182	LOC_Os11g26190 // expressed protein
97	Os.10179.1.S1_at	Os.5099.1.S1_at	0.788997	LOC_Os10g39170 // peroxidase 1 precursor, putative, expressed
98	Os.10179.1.S1_at	Os.55736.1.S1_at	0.788868	LOC_Os06g14630 // anther-specific proline-rich protein APG, putative, expressed
99	Os.10179.1.S1_at	Os.7767.1.S1_at	0.788626	LOC_Os07g04930 // vegetative cell wall protein gp1 precursor, putative, expressed
100	Os.10179.1.S1_at	OsAffx.9099.1.S1_x_at	0.788387	LOC_Os01g44130 // aspartic proteinase oryzasin-1 precursor, putative, expressed

## Sheet: OsBAG4 co-expresstion top 100
NO	Probeset1	Probeset2	Correlation	Probeset2 Annotaion
1	Os.20681.2.A1_at	Os.20681.2.A1_at	1	LOC_Os01g61500 // BCL-2 binding anthanogene-1, putative, expressed
2	Os.20681.2.A1_at	Os.20681.1.S1_x_at	0.923196	LOC_Os01g61500 // BCL-2 binding anthanogene-1, putative, expressed
3	Os.20681.2.A1_at	OsAffx.23914.1.S1_at	0.673304	LOC_Os01g64410 // plant-specific domain TIGR01568 family protein, expressed
4	Os.20681.2.A1_at	Os.30823.1.S1_at	0.671978	N/A // N/A
5	Os.20681.2.A1_at	Os.13562.1.S1_at	0.657285	LOC_Os05g35410 // potassium channel AKT2/3, putative, expressed
6	Os.20681.2.A1_at	Os.10101.1.S1_at	0.648762	LOC_Os05g36990 // plant-specific domain TIGR01568 family protein, expressed
7	Os.20681.2.A1_at	Os.49761.1.S1_at	0.644454	LOC_Os03g54170 // MADS-box transcription factor 34, putative, expressed
8	Os.20681.2.A1_at	Os.53486.1.S1_at	0.642593	LOC_Os02g43560 // OsWRKY34 - Superfamily of rice TFs having WRKY and zinc finger domains, expressed
9	Os.20681.2.A1_at	Os.27308.1.S1_at	0.640375	LOC_Os05g38120 // homeodomain protein JUBEL2, putative, expressed
10	Os.20681.2.A1_at	Os.10618.1.S1_s_at	0.638136	LOC_Os08g40260 // squamosa promoter-binding-like protein 16, putative, expressed
11	Os.20681.2.A1_at	Os.40424.1.S1_at	0.634203	LOC_Os01g54340 // plant-specific domain TIGR01615 family protein, expressed
12	Os.20681.2.A1_at	Os.19639.1.S1_at	0.628292	LOC_Os01g62920 // homeodomain protein JUBEL2, putative, expressed
13	Os.20681.2.A1_at	Os.4573.1.S1_at	0.624682	LOC_Os07g41370 // MADS-box transcription factor 18, putative, expressed
14	Os.20681.2.A1_at	Os.5660.1.S1_at	0.624416	LOC_Os05g04170 // ACS-like protein, putative, expressed
15	Os.20681.2.A1_at	Os.11913.2.S1_a_at	0.624335	LOC_Os03g22270 // auxin-repressed protein, putative, expressed
16	Os.20681.2.A1_at	OsAffx.23086.1.S1_s_at	0.623697	LOC_Os01g01970 // expressed protein
17	Os.20681.2.A1_at	Os.7811.1.S1_at	0.617074	LOC_Os06g12220 // HVA22-like protein a, putative, expressed
18	Os.20681.2.A1_at	Os.12823.1.S1_at	0.614503	LOC_Os04g16450 // aquaporin PIP2.6, putative, expressed
19	Os.20681.2.A1_at	Os.50398.1.S1_at	0.612495	LOC_Os02g44090 // expressed protein
20	Os.20681.2.A1_at	Os.11876.1.S1_s_at	0.611596	LOC_Os05g14180 // OsIAA17 - Auxin-responsive Aux/IAA gene family member, expressed
21	Os.20681.2.A1_at	OsAffx.24704.1.S1_s_at	0.611001	LOC_Os02g43560 // OsWRKY34 - Superfamily of rice TFs having WRKY and zinc finger domains, expressed
22	Os.20681.2.A1_at	Os.48723.1.A1_at	0.61091	LOC_Os07g09710 // F-box domain containing protein, expressed
23	Os.20681.2.A1_at	Os.5079.1.S1_at	0.609619	LOC_Os05g06110 // villin-1, putative, expressed
24	Os.20681.2.A1_at	Os.49570.1.S1_at	0.606038	LOC_Os02g47230 // expressed protein
25	Os.20681.2.A1_at	Os.14313.1.S1_s_at	0.60212	LOC_Os01g61620 // ATP binding protein, putative, expressed
26	Os.20681.2.A1_at	Os.27757.1.A1_s_at	0.601969	LOC_Os10g23220 // expressed protein
27	Os.20681.2.A1_at	Os.53641.1.S1_at	0.601953	LOC_Os04g46060 // OsWRKY36 - Superfamily of rice TFs having WRKY and zinc finger domains, expressed
28	Os.20681.2.A1_at	Os.3356.1.S1_at	0.599969	LOC_Os10g25090 // leucine-rich repeat transmembrane protein kinase 1, putative, expressed
29	Os.20681.2.A1_at	Os.16912.1.A1_at	0.598324	LOC_Os02g53994 // expressed protein
30	Os.20681.2.A1_at	Os.6633.1.S1_at	0.597135	LOC_Os07g10530 // carboxyl-terminal peptidase, putative, expressed
31	Os.20681.2.A1_at	Os.24613.1.S1_at	0.597026	LOC_Os12g07160 // viral A-type inclusion protein repeat containing protein, expressed
32	Os.20681.2.A1_at	Os.21902.1.S1_at	0.594844	LOC_Os09g28300 // remorin, C-terminal region family protein, expressed
33	Os.20681.2.A1_at	OsAffx.14585.1.S1_s_at	0.592852	LOC_Os05g07820 // leucine-rich repeat receptor protein kinase EXS precursor, putative, expressed
34	Os.20681.2.A1_at	Os.24364.1.A1_at	0.592838	LOC_Os02g51860 // ATP binding protein, putative, expressed
35	Os.20681.2.A1_at	Os.39828.1.A1_s_at	0.591691	LOC_Os03g52690 // CBS domain protein, putative, expressed
36	Os.20681.2.A1_at	Os.19372.1.A1_s_at	0.59137	LOC_Os06g40704 // ZAC, putative, expressed
37	Os.20681.2.A1_at	Os.48467.1.S1_at	0.589681	LOC_Os05g33690 // receptor-like protein kinase precursor, putative, expressed
38	Os.20681.2.A1_at	Os.182.1.S1_at	0.58893	LOC_Os07g48780 // calmodulin, putative, expressed
39	Os.20681.2.A1_at	Os.24691.1.A1_s_at	0.588451	LOC_Os04g49320 // expressed protein
40	Os.20681.2.A1_at	Os.12750.1.S1_x_at	0.587244	LOC_Os07g01820 // MADS-box transcription factor 15, putative, expressed
41	Os.20681.2.A1_at	Os.31272.1.S2_at	0.584716	LOC_Os01g60040 // cytoskeleton-associated protein 5, putative, expressed
42	Os.20681.2.A1_at	Os.12142.1.S1_at	0.584181	LOC_Os06g17440 // TMV-MP30 binding protein 2C, putative, expressed
43	Os.20681.2.A1_at	Os.8710.1.S1_at	0.583401	LOC_Os05g48240 // dynamin-related protein 1A, putative, expressed
44	Os.20681.2.A1_at	Os.2254.1.S1_at	0.583129	LOC_Os07g03770 // homeobox protein rough sheath 1, putative, expressed
45	Os.20681.2.A1_at	Os.8719.1.A1_s_at	0.582923	LOC_Os03g06510 // viral A-type inclusion protein repeat containing protein, expressed
46	Os.20681.2.A1_at	Os.11460.1.S1_at	0.582376	LOC_Os07g46490 // phosphatidylinositol-4-phosphate 5-kinase 4, putative, expressed
47	Os.20681.2.A1_at	Os.7607.1.S1_at	0.581184	LOC_Os07g47480 // copper chaperone, putative, expressed
48	Os.20681.2.A1_at	Os.46187.1.S1_at	0.579972	LOC_Os07g40940 // glucan endo-1,3-beta-glucosidase 3 precursor, putative, expressed
49	Os.20681.2.A1_at	Os.151.1.S1_x_at	0.579611	LOC_Os03g51690 // homeobox protein OSH1, putative, expressed
50	Os.20681.2.A1_at	Os.2348.1.S1_a_at	0.578968	LOC_Os03g54160 // MADS-box transcription factor 14, putative, expressed
51	Os.20681.2.A1_at	Os.40687.1.S1_at	0.578263	LOC_Os01g33080 // fimbrin-like protein 3, putative, expressed
52	Os.20681.2.A1_at	Os.8486.1.S2_s_at	0.577991	LOC_Os07g44960 // expressed protein
53	Os.20681.2.A1_at	Os.38052.1.S1_at	0.576267	LOC_Os07g01860 // expressed protein
54	Os.20681.2.A1_at	Os.10783.1.S1_at	0.576091	LOC_Os01g64650 // VAMP-like protein YKT62, putative, expressed
55	Os.20681.2.A1_at	Os.23158.1.S1_at	0.576075	LOC_Os05g02820 // expressed protein
56	Os.20681.2.A1_at	Os.18249.1.S1_at	0.576026	LOC_Os04g45720 // aldehyde dehydrogenase 3B1, putative, expressed
57	Os.20681.2.A1_at	Os.5641.1.S1_a_at	0.575239	LOC_Os04g52380 // methyl-CpG binding domain containing protein, expressed
58	Os.20681.2.A1_at	Os.14811.1.S1_at	0.575229	LOC_Os04g46892 // expressed protein
59	Os.20681.2.A1_at	Os.27254.1.S1_s_at	0.574955	LOC_Os03g06680 // plant-specific domain TIGR01615 family protein, expressed
60	Os.20681.2.A1_at	Os.36767.1.S1_at	0.574906	LOC_Os01g04330 // calmodulin-related protein 2, touch-induced, putative, expressed
61	Os.20681.2.A1_at	Os.50846.1.S1_s_at	0.574823	LOC_Os01g10490 // meiosis 5, putative, expressed
62	Os.20681.2.A1_at	Os.23241.1.S1_x_at	0.573902	LOC_Os10g32830 // protein kinase/ ribokinase, putative
63	Os.20681.2.A1_at	Os.12733.2.S1_at	0.572406	LOC_Os01g13030 // OsIAA3 - Auxin-responsive Aux/IAA gene family member, expressed
64	Os.20681.2.A1_at	OsAffx.12755.1.S1_at	0.572216	LOC_Os03g06510 // viral A-type inclusion protein repeat containing protein, expressed
65	Os.20681.2.A1_at	Os.18349.1.A1_s_at	0.571771	LOC_Os11g08090 // armadillo/beta-catenin-like repeat family protein, expressed
66	Os.20681.2.A1_at	Os.7680.1.S1_at	0.571473	LOC_Os07g04020 // expressed protein
67	Os.20681.2.A1_at	Os.9627.1.S1_at	0.57117	LOC_Os11g06390 // actin-7, putative, expressed
68	Os.20681.2.A1_at	Os.17070.1.S1_at	0.571112	LOC_Os04g36054 // auxin response factor 1, putative, expressed
69	Os.20681.2.A1_at	Os.28458.1.S1_at	0.570561	LOC_Os01g11040 // SCAR-like protein 2, putative, expressed
70	Os.20681.2.A1_at	Os.44546.1.A1_x_at	0.570347	LOC_Os07g03770 // homeobox protein rough sheath 1, putative, expressed
71	Os.20681.2.A1_at	Os.8385.1.S1_s_at	0.569829	LOC_Os10g05970 // proline-rich protein, putative, expressed
72	Os.20681.2.A1_at	Os.11158.1.S1_at	0.568938	LOC_Os02g17640 // isochorismatase family protein rutB, putative, expressed
73	Os.20681.2.A1_at	Os.27379.1.S1_at	0.568425	LOC_Os08g44360 // male sterility protein 2, putative, expressed
74	Os.20681.2.A1_at	Os.11496.1.S1_at	0.567536	LOC_Os03g48390 // expressed protein
75	Os.20681.2.A1_at	Os.54417.1.S1_at	0.567161	N/A // N/A
76	Os.20681.2.A1_at	Os.35068.1.S1_at	0.566805	LOC_Os12g18770 // oxysterol binding protein, putative, expressed
77	Os.20681.2.A1_at	Os.23036.1.A1_at	0.566701	LOC_Os11g11110 // expressed protein
78	Os.20681.2.A1_at	Os.51108.1.S1_at	0.566653	LOC_Os02g02690 // expressed protein
79	Os.20681.2.A1_at	Os.23649.1.S1_a_at	0.566343	LOC_Os03g61620 // expressed protein
80	Os.20681.2.A1_at	Os.54104.1.S1_at	0.565603	LOC_Os02g43740 // protein kinase G11A, putative, expressed
81	Os.20681.2.A1_at	Os.57543.1.S1_at	0.565592	LOC_Os07g01820 // MADS-box transcription factor 15, putative, expressed
82	Os.20681.2.A1_at	Os.52439.1.S1_at	0.564621	LOC_Os04g55240 // DNA-binding WRKY, putative, expressed
83	Os.20681.2.A1_at	OsAffx.17329.1.S1_s_at	0.564611	LOC_Os08g34510 // expressed protein
84	Os.20681.2.A1_at	Os.1308.1.S1_at	0.564551	LOC_Os09g07510 // serine/threonine-protein phosphatase 2A 65 kDa regulatory subunit Abeta isoform, putative, expressed
85	Os.20681.2.A1_at	Os.49171.1.A1_x_at	0.564228	LOC_Os01g07630 // BRASSINOSTEROID INSENSITIVE 1-associated receptor kinase 1 precursor, putative, expressed
86	Os.20681.2.A1_at	OsAffx.32209.1.A1_at	0.56402	N/A // N/A
87	Os.20681.2.A1_at	Os.49581.1.S1_at	0.563957	LOC_Os06g40730 // expressed protein
88	Os.20681.2.A1_at	Os.4376.1.S1_at	0.563783	LOC_Os02g58730 // rac-like GTP-binding protein 5, putative, expressed
89	Os.20681.2.A1_at	Os.32232.1.S1_at	0.563486	LOC_Os01g64256 // transposon protein, putative, Mutator sub-class, expressed
90	Os.20681.2.A1_at	Os.53609.1.S1_s_at	0.562546	LOC_Os01g10490 // meiosis 5, putative, expressed
91	Os.20681.2.A1_at	Os.11476.1.S1_at	0.561818	LOC_Os06g10230 // receptor-like protein kinase 5 precursor, putative, expressed
92	Os.20681.2.A1_at	Os.12750.1.S1_a_at	0.561227	LOC_Os07g01820 // MADS-box transcription factor 15, putative, expressed
93	Os.20681.2.A1_at	Os.57424.1.S1_at	0.560762	LOC_Os03g19350 // ATP-dependent protease La family protein, expressed
94	Os.20681.2.A1_at	Os.26705.1.S1_at	0.56073	LOC_Os07g38590 // carboxyl-terminal peptidase, putative, expressed
95	Os.20681.2.A1_at	Os.49074.1.A1_at	0.560692	N/A // N/A
96	Os.20681.2.A1_at	Os.54781.1.S1_at	0.560571	LOC_Os07g39220 // BES1/BZR1 homolog protein 1, putative, expressed
97	Os.20681.2.A1_at	Os.12889.1.S1_x_at	0.560171	LOC_Os03g08500 // ethylene-responsive element binding protein 2, putative, expressed
98	Os.20681.2.A1_at	OsAffx.1892.1.S1_x_at	0.559574	N/A // N/A
99	Os.20681.2.A1_at	Os.38001.1.A1_at	0.559265	LOC_Os02g58030 // leucine-rich repeat-containing protein 40, putative, expressed
100	Os.20681.2.A1_at	Os.24364.1.A1_s_at	0.55796	LOC_Os02g51860 // ATP binding protein, putative, expressed

## Sheet: OsBAG6 co-expresstion top 100
NO	Probeset1	Probeset2	Correlation	Probeset2 Annotaion
1	OsAffx.19095.1.S1_at	OsAffx.19095.1.S1_at	1	LOC_Os11g31060 // BAG domain containing protein, expressed
2	OsAffx.19095.1.S1_at	Os.11112.1.S1_s_at	0.951067	LOC_Os08g40910 // expressed protein
3	OsAffx.19095.1.S1_at	Os.22730.1.S1_at	0.933528	LOC_Os03g16040 // 17.4 kDa class I heat shock protein 2, putative, expressed
4	OsAffx.19095.1.S1_at	Os.37773.1.S1_at	0.911687	LOC_Os03g16030 // 17.4 kDa class I heat shock protein 3, putative, expressed
5	OsAffx.19095.1.S1_at	Os.55371.1.S1_at	0.905599	LOC_Os02g48140 // 17.4 kDa class I heat shock protein 3, putative, expressed
6	OsAffx.19095.1.S1_at	Os.37773.1.S1_x_at	0.901273	LOC_Os03g16030 // 17.4 kDa class I heat shock protein 3, putative, expressed
7	OsAffx.19095.1.S1_at	Os.22731.1.S1_at	0.898342	LOC_Os03g16020 // 17.4 kDa class I heat shock protein 2, putative, expressed
8	OsAffx.19095.1.S1_at	Os.52123.1.S1_at	0.886034	LOC_Os02g38386 // NBS-LRR disease resistance protein, putative, expressed
9	OsAffx.19095.1.S1_at	Os.10942.1.S1_a_at	0.870759	LOC_Os10g28340 // heat shock factor protein HSF30, putative, expressed
10	OsAffx.19095.1.S1_at	Os.39876.1.S1_at	0.862678	LOC_Os04g48030 // heat shock factor protein 4, putative, expressed
11	OsAffx.19095.1.S1_at	Os.35463.1.S1_at	0.857432	LOC_Os05g48810 // dnaJ homolog subfamily B member 5, putative, expressed
12	OsAffx.19095.1.S1_at	Os.8971.1.S1_at	0.848369	LOC_Os05g44340 // heat shock protein 101, putative, expressed
13	OsAffx.19095.1.S1_at	Os.49648.1.S1_s_at	0.847818	LOC_Os02g54140 // 17.5 kDa class II heat shock protein, putative, expressed
14	OsAffx.19095.1.S1_at	Os.10058.1.S1_at	0.844952	LOC_Os05g31620 // polcalcin Jun o 2, putative, expressed
15	OsAffx.19095.1.S1_at	Os.2292.2.S1_at	0.843684	LOC_Os03g53340 // heat shock factor protein HSF8, putative, expressed
16	OsAffx.19095.1.S1_at	Os.50658.1.S1_x_at	0.841355	N/A // N/A
17	OsAffx.19095.1.S1_at	Os.519.1.S1_at	0.83988	LOC_Os01g08860 // 17.5 kDa class II heat shock protein, putative, expressed
18	OsAffx.19095.1.S1_at	Os.12241.2.S1_at	0.839182	LOC_Os03g14050 // thaumatin-like protein 1 precursor, putative, expressed
19	OsAffx.19095.1.S1_at	Os.8724.1.S1_at	0.826646	LOC_Os07g37400 // F-box domain containing protein, expressed
20	OsAffx.19095.1.S1_at	Os.24611.1.S1_at	0.818693	LOC_Os02g40900 // mgc10433l protein, putative, expressed
21	OsAffx.19095.1.S1_at	Os.49648.1.S1_at	0.816687	LOC_Os02g54140 // 17.5 kDa class II heat shock protein, putative, expressed
22	OsAffx.19095.1.S1_at	Os.51521.1.S2_at	0.8164	LOC_Os06g43980 // expressed protein
23	OsAffx.19095.1.S1_at	OsAffx.32307.1.S1_at	0.815365	N/A // N/A
24	OsAffx.19095.1.S1_at	Os.2292.1.S1_a_at	0.813714	LOC_Os03g53340 // heat shock factor protein HSF8, putative, expressed
25	OsAffx.19095.1.S1_at	Os.26695.1.S1_at	0.80915	LOC_Os03g60080 // NAC domain-containing protein 67, putative, expressed
26	OsAffx.19095.1.S1_at	Os.2292.3.S1_x_at	0.806086	LOC_Os03g53340 // heat shock factor protein HSF8, putative, expressed
27	OsAffx.19095.1.S1_at	OsAffx.32275.1.S1_at	0.804137	N/A // N/A
28	OsAffx.19095.1.S1_at	Os.5599.1.S1_at	0.802467	LOC_Os08g31580 // DRE binding factor 1, putative, expressed
29	OsAffx.19095.1.S1_at	OsAffx.21694.3.S1_x_at	0.801933	LOC_Os12g23610 // ATP synthase, A subunit family protein
30	OsAffx.19095.1.S1_at	OsAffx.19953.6.S1_s_at	0.799609	LOC_Os12g34130 // mitochondrial ribosomal protein S3, putative, expressed
31	OsAffx.19095.1.S1_at	OsAffx.23061.1.S2_at	0.799601	N/A // N/A
32	OsAffx.19095.1.S1_at	OsAffx.32303.1.S1_x_at	0.794861	LOC_Os12g33944 // expressed protein
33	OsAffx.19095.1.S1_at	OsAffx.19953.7.S1_s_at	0.7947	LOC_Os12g33930 // ribosomal protein S12 containing protein, expressed
34	OsAffx.19095.1.S1_at	OsAffx.32278.1.S1_at	0.794388	N/A // N/A
35	OsAffx.19095.1.S1_at	Os.50681.1.S1_x_at	0.793691	N/A // N/A
36	OsAffx.19095.1.S1_at	Os.5599.1.S1_x_at	0.792913	LOC_Os08g31580 // DRE binding factor 1, putative, expressed
37	OsAffx.19095.1.S1_at	Os.24051.1.S1_at	0.792339	N/A // N/A
38	OsAffx.19095.1.S1_at	OsAffx.32322.1.S1_at	0.792211	N/A // N/A
39	OsAffx.19095.1.S1_at	Os.6314.1.S1_at	0.792199	LOC_Os04g33820 // F-box domain containing protein, expressed
40	OsAffx.19095.1.S1_at	Os.3766.1.S1_at	0.788472	LOC_Os01g58420 // ethylene-responsive transcription factor 4, putative, expressed
41	OsAffx.19095.1.S1_at	OsAffx.32248.1.S1_x_at	0.788361	LOC_Os12g34010 // expressed protein
42	OsAffx.19095.1.S1_at	Os.38283.1.S4_at	0.786961	LOC_Os05g41550 // expressed protein
43	OsAffx.19095.1.S1_at	Os.51749.1.S1_at	0.786786	N/A // N/A
44	OsAffx.19095.1.S1_at	Os.13708.2.A1_at	0.786432	LOC_Os03g22790 // beta-amylase, putative, expressed
45	OsAffx.19095.1.S1_at	Os.50727.1.S1_x_at	0.784962	N/A // N/A
46	OsAffx.19095.1.S1_at	Os.15295.1.S1_at	0.784792	LOC_Os08g19670 // expressed protein
47	OsAffx.19095.1.S1_at	OsAffx.14373.1.S1_s_at	0.782153	LOC_Os04g52090 // ethylene-responsive transcription factor 4, putative, expressed
48	OsAffx.19095.1.S1_at	Os.53946.1.S1_at	0.781729	LOC_Os08g41440 // NAD-dependent epimerase/dehydratase family protein, putative, expressed
49	OsAffx.19095.1.S1_at	OsAffx.31745.2.S1_s_at	0.780789	LOC_Os12g14930 // mitochondrial 22 kDa protein, putative, expressed
50	OsAffx.19095.1.S1_at	OsAffx.32302.1.A1_at	0.778826	N/A // N/A
51	OsAffx.19095.1.S1_at	Os.41109.1.S1_at	0.778374	LOC_Os07g43740 // ubiquitin-protein ligase CIP8, putative, expressed
52	OsAffx.19095.1.S1_at	OsAffx.32249.1.S1_at	0.778329	N/A // N/A
53	OsAffx.19095.1.S1_at	OsAffx.32306.1.S1_x_at	0.777757	LOC_Os09g08910 // ATP synthase alpha chain, mitochondrial, putative, expressed
54	OsAffx.19095.1.S1_at	Os.49591.1.S1_at	0.7776	LOC_Os03g05750 // metal ion binding protein, putative, expressed
55	OsAffx.19095.1.S1_at	Os.46024.1.S1_at	0.777046	LOC_Os01g62290 // heat shock cognate 70 kDa protein, putative, expressed
56	OsAffx.19095.1.S1_at	OsAffx.32284.1.S1_x_at	0.773294	LOC_Os01g58010 // ATP synthase a chain, putative
57	OsAffx.19095.1.S1_at	Os.50642.1.S1_at	0.773215	LOC_Os04g48030 // heat shock factor protein 4, putative, expressed
58	OsAffx.19095.1.S1_at	Os.50723.1.S1_x_at	0.772969	N/A // N/A
59	OsAffx.19095.1.S1_at	OsAffx.32107.1.S1_at	0.770453	LOC_Os12g39920 // expressed protein
60	OsAffx.19095.1.S1_at	OsAffx.32341.1.A1_at	0.770447	N/A // N/A
61	OsAffx.19095.1.S1_at	Os.52451.1.A1_at	0.76924	LOC_Os09g28440 // AP2 domain containing protein, expressed
62	OsAffx.19095.1.S1_at	OsAffx.32301.1.S1_at	0.769021	N/A // N/A
63	OsAffx.19095.1.S1_at	Os.41109.1.S1_x_at	0.768829	LOC_Os07g43740 // ubiquitin-protein ligase CIP8, putative, expressed
64	OsAffx.19095.1.S1_at	Os.50727.1.A1_x_at	0.767815	N/A // N/A
65	OsAffx.19095.1.S1_at	OsAffx.26050.4.S1_at	0.767026	LOC_Os09g08910 // ATP synthase alpha chain, mitochondrial, putative, expressed
66	OsAffx.19095.1.S1_at	Os.3808.4.S1_x_at	0.766874	LOC_Os01g09220 // transposon protein, putative, CACTA, En/Spm sub-class, expressed
67	OsAffx.19095.1.S1_at	Os.25311.1.A1_at	0.765348	N/A // N/A
68	OsAffx.19095.1.S1_at	OsAffx.32245.1.S1_at	0.761789	N/A // N/A
69	OsAffx.19095.1.S1_at	OsAffx.32283.1.A1_at	0.760499	N/A // N/A
70	OsAffx.19095.1.S1_at	OsAffx.1910.1.S1_at	0.760256	N/A // N/A
71	OsAffx.19095.1.S1_at	Os.22577.1.S1_x_at	0.760146	LOC_Os01g32770 // seed specific protein Bn15D17A, putative, expressed
72	OsAffx.19095.1.S1_at	OsAffx.22951.1.S1_s_at	0.759275	N/A // N/A
73	OsAffx.19095.1.S1_at	OsAffx.24369.2.S1_at	0.759145	N/A // N/A
74	OsAffx.19095.1.S1_at	OsAffx.10805.1.S1_at	0.757952	N/A // N/A
75	OsAffx.19095.1.S1_at	Os.12580.1.A1_at	0.757887	N/A // N/A
76	OsAffx.19095.1.S1_at	OsAffx.1891.1.S1_x_at	0.757359	LOC_Os12g33944 // expressed protein
77	OsAffx.19095.1.S1_at	Os.50660.1.S1_at	0.756967	N/A // N/A
78	OsAffx.19095.1.S1_at	Os.24165.1.A1_at	0.755683	N/A // N/A
79	OsAffx.19095.1.S1_at	OsAffx.32339.1.S1_x_at	0.754196	N/A // N/A
80	OsAffx.19095.1.S1_at	OsAffx.32294.1.S1_at	0.753215	N/A // N/A
81	OsAffx.19095.1.S1_at	OsAffx.32273.1.S1_at	0.752694	N/A // N/A
82	OsAffx.19095.1.S1_at	Os.15295.2.S1_x_at	0.751809	LOC_Os08g19670 // expressed protein
83	OsAffx.19095.1.S1_at	Os.13783.1.S1_at	0.75169	LOC_Os02g04860 // expressed protein
84	OsAffx.19095.1.S1_at	OsAffx.32343.1.S1_at	0.75097	N/A // N/A
85	OsAffx.19095.1.S1_at	OsAffx.32293.1.S1_at	0.749862	N/A // N/A
86	OsAffx.19095.1.S1_at	OsAffx.23064.2.S1_x_at	0.749517	N/A // N/A
87	OsAffx.19095.1.S1_at	Os.36776.1.S1_at	0.74779	LOC_Os01g58800 // expressed protein
88	OsAffx.19095.1.S1_at	OsAffx.32289.1.S1_at	0.74696	N/A // N/A
89	OsAffx.19095.1.S1_at	OsAffx.32290.1.S1_at	0.746937	N/A // N/A
90	OsAffx.19095.1.S1_at	Os.23618.1.S1_at	0.746788	LOC_Os01g12460 // expressed protein
91	OsAffx.19095.1.S1_at	Os.10591.1.S1_at	0.744462	LOC_Os04g50790 // nucleic acid binding protein, putative, expressed
92	OsAffx.19095.1.S1_at	Os.10386.1.S1_at	0.743076	LOC_Os04g38610 // RAN guanine nucleotide release factor, putative, expressed
93	OsAffx.19095.1.S1_at	Os.50728.1.S1_x_at	0.741938	N/A // N/A
94	OsAffx.19095.1.S1_at	OsAffx.23061.2.S1_at	0.741407	LOC_Os12g34110 // ATP synthase subunit C family protein
95	OsAffx.19095.1.S1_at	Os.49536.1.S1_at	0.738855	LOC_Os08g09950 // acyl-desaturase, chloroplast precursor, putative, expressed
96	OsAffx.19095.1.S1_at	OsAffx.10855.1.S1_at	0.735276	N/A // N/A
97	OsAffx.19095.1.S1_at	Os.10162.1.S1_at	0.73519	LOC_Os01g28790 // PRAS-rich protein, putative, expressed
98	OsAffx.19095.1.S1_at	OsAffx.32280.1.S1_at	0.733805	N/A // N/A
99	OsAffx.19095.1.S1_at	Os.53275.1.S1_at	0.731454	LOC_Os05g08420 // expressed protein
100	OsAffx.19095.1.S1_at	Os.22577.2.S1_x_at	0.730259	LOC_Os01g32770 // seed specific protein Bn15D17A, putative, expressed

## Sheet: OsCESA1 co-expresstion top 100
NO	Probeset1	Probeset2	Correlation	Probeset2 Annotaion
1	Os.10183.1.S2_at	Os.10183.1.S2_at	1	LOC_Os05g08370 // CESA1 - cellulose synthase, expressed
2	Os.10183.1.S2_at	Os.10176.1.S1_at	0.935347	LOC_Os07g10770 // CESA8 - cellulose synthase, expressed
3	Os.10183.1.S2_at	Os.7609.1.S1_at	0.916444	LOC_Os05g32110 // COBRA-like protein 4 precursor, putative, expressed
4	Os.10183.1.S2_at	Os.12399.1.S1_at	0.904454	LOC_Os09g32080 // endochitinase A2 precursor, putative, expressed
5	Os.10183.1.S2_at	Os.37225.1.S1_at	0.895452	LOC_Os07g27810 // fiber protein Fb34, putative, expressed
6	Os.10183.1.S2_at	Os.5987.1.S1_at	0.892977	LOC_Os05g32500 // expressed protein
7	Os.10183.1.S2_at	Os.6247.1.S1_at	0.883574	LOC_Os09g36350 // endoglucanase 1 precursor, putative, expressed
8	Os.10183.1.S2_at	Os.9709.2.S1_at	0.878598	LOC_Os08g06380 // CSLF6 - cellulose synthase-like family F; beta1,3;1,4 glucan synthase, expressed
9	Os.10183.1.S2_at	Os.12780.1.S1_at	0.862721	LOC_Os08g02120 // fructokinase-2, putative, expressed
10	Os.10183.1.S2_at	Os.53704.1.S1_x_at	0.861254	LOC_Os05g48900 // fasciclin-like arabinogalactan protein 7 precursor, putative, expressed
11	Os.10183.1.S2_at	Os.49544.1.S1_at	0.860975	LOC_Os09g07350 // fasciclin-like arabinogalactan protein 8 precursor, putative, expressed
12	Os.10183.1.S2_at	Os.28002.1.S1_at	0.854448	LOC_Os08g35710 // expressed protein
13	Os.10183.1.S2_at	Os.10179.1.S1_at	0.851217	LOC_Os06g03640 // protein binding protein, putative, expressed
14	Os.10183.1.S2_at	Os.10701.1.S1_at	0.850096	LOC_Os03g52630 // endo-1,4-beta-glucanase Cel1, putative, expressed
15	Os.10183.1.S2_at	Os.8314.1.S1_at	0.845593	LOC_Os04g59330 // expressed protein
16	Os.10183.1.S2_at	Os.10576.1.S1_at	0.838604	LOC_Os02g33550 // VAMP protein SEC22, putative, expressed
17	Os.10183.1.S2_at	OsAffx.23081.1.S1_at	0.836146	N/A // N/A
18	Os.10183.1.S2_at	Os.5908.1.S1_at	0.83168	LOC_Os01g47780 // fasciclin-like arabinogalactan protein 7 precursor, putative, expressed
19	Os.10183.1.S2_at	Os.162.1.S1_at	0.829951	LOC_Os05g20050 // ras-related protein RGP2, putative, expressed
20	Os.10183.1.S2_at	OsAffx.14314.1.S1_x_at	0.828577	LOC_Os04g47520 // auxin-independent growth promoter, putative, expressed
21	Os.10183.1.S2_at	Os.5826.2.S1_a_at	0.827277	LOC_Os03g03600 // fasciclin-like arabinogalactan protein 8 precursor, putative, expressed
22	Os.10183.1.S2_at	Os.9514.1.S1_at	0.821838	LOC_Os05g04820 // MYB2, putative, expressed
23	Os.10183.1.S2_at	Os.49701.1.S1_at	0.818646	LOC_Os04g33990 // VAMP protein SEC22, putative, expressed
24	Os.10183.1.S2_at	Os.12374.2.S1_x_at	0.811814	LOC_Os12g42884 // 5-methyltetrahydropteroyltriglutamate--homocysteine methyltransferase, putative, expressed
25	Os.10183.1.S2_at	Os.4619.1.S1_at	0.809743	N/A // N/A
26	Os.10183.1.S2_at	Os.9211.1.S1_at	0.806876	LOC_Os07g45060 // GPI-anchored protein At5g19240 precursor, putative, expressed
27	Os.10183.1.S2_at	Os.5927.1.S1_at	0.804935	LOC_Os03g63540 // expressed in cucumber hypocotyls, putative, expressed
28	Os.10183.1.S2_at	Os.10151.1.S1_at	0.801329	LOC_Os11g26860 // serine hydroxymethyltransferase, mitochondrial precursor, putative, expressed
29	Os.10183.1.S2_at	Os.9178.1.S1_at	0.800936	LOC_Os11g07670 // disease resistance response protein 206, putative, expressed
30	Os.10183.1.S2_at	Os.5095.1.S1_at	0.797878	LOC_Os07g40130 // transcriptional regulatory protein algP, putative
31	Os.10183.1.S2_at	Os.11677.1.S1_x_at	0.797734	LOC_Os05g03190 // IQD1, putative, expressed
32	Os.10183.1.S2_at	Os.52629.1.S1_at	0.797261	N/A // N/A
33	Os.10183.1.S2_at	Os.5746.1.S1_at	0.796818	LOC_Os03g56380 // ankyrin-like protein, putative, expressed
34	Os.10183.1.S2_at	Os.7186.1.S1_at	0.7968	LOC_Os07g44350 // novel plant SNARE 11, putative, expressed
35	Os.10183.1.S2_at	Os.5913.1.S1_at	0.79509	LOC_Os04g57970 // expressed protein
36	Os.10183.1.S2_at	Os.8247.1.S1_at	0.792883	LOC_Os03g51150 // expressed protein
37	Os.10183.1.S2_at	Os.10473.1.S1_at	0.789806	LOC_Os12g25690 // UDP-glucose 6-dehydrogenase, putative, expressed
38	Os.10183.1.S2_at	Os.6592.1.S1_a_at	0.788545	LOC_Os05g04380 // peroxidase 1 precursor, putative, expressed
39	Os.10183.1.S2_at	Os.10178.2.S1_a_at	0.787216	LOC_Os07g24190 // CESA3 - cellulose synthase, expressed
40	Os.10183.1.S2_at	Os.16627.1.S1_at	0.786984	N/A // N/A
41	Os.10183.1.S2_at	Os.5832.1.S1_at	0.782838	LOC_Os01g64490 // ATP binding protein, putative, expressed
42	Os.10183.1.S2_at	Os.7098.1.S1_at	0.779684	LOC_Os05g01810 // xylem cysteine proteinase 2 precursor, putative, expressed
43	Os.10183.1.S2_at	Os.21812.2.S1_a_at	0.778853	LOC_Os03g12250 // atypical receptor-like kinase MARK, putative, expressed
44	Os.10183.1.S2_at	Os.50276.1.S1_at	0.777556	LOC_Os05g50510 // O-acetyltransferase, putative, expressed
45	Os.10183.1.S2_at	Os.23225.1.A1_at	0.777291	LOC_Os09g20880 // ATP binding protein, putative, expressed
46	Os.10183.1.S2_at	Os.52598.1.S1_at	0.777194	LOC_Os07g07340 // glucan endo-1,3-beta-glucosidase 5 precursor, putative, expressed
47	Os.10183.1.S2_at	Os.18474.1.S1_at	0.777067	LOC_Os04g41810 // dopamine beta-monooxygenase, putative, expressed
48	Os.10183.1.S2_at	Os.5881.1.S1_at	0.776561	LOC_Os05g19030 // expressed protein
49	Os.10183.1.S2_at	Os.820.1.S1_s_at	0.775417	LOC_Os01g19020 // peroxidase 1 precursor, putative, expressed
50	Os.10183.1.S2_at	Os.329.1.S1_at	0.77504	LOC_Os04g55670 // glycosyltransferase, putative, expressed
51	Os.10183.1.S2_at	Os.10665.1.S1_at	0.77202	LOC_Os12g05550 // sialyltransferase-like protein, putative, expressed
52	Os.10183.1.S2_at	Os.5843.1.S1_at	0.770966	LOC_Os06g46799 // peroxidase 39 precursor, putative, expressed
53	Os.10183.1.S2_at	Os.12288.1.S1_at	0.770618	LOC_Os08g13920 // xyloglucan endotransglycosylase/hydrolase protein 8 precursor, putative, expressed
54	Os.10183.1.S2_at	Os.7758.1.S1_at	0.770408	LOC_Os02g10480 // GTPase activating protein, putative, expressed
55	Os.10183.1.S2_at	Os.9231.1.S1_at	0.769884	LOC_Os04g01300 // transmembrane protein 115, putative, expressed
56	Os.10183.1.S2_at	Os.4370.2.S1_x_at	0.769859	LOC_Os06g06780 // harpin-induced protein, putative, expressed
57	Os.10183.1.S2_at	Os.7916.1.S1_at	0.768969	LOC_Os01g59150 // tubulin beta-4 chain, putative, expressed
58	Os.10183.1.S2_at	OsAffx.19841.1.S1_at	0.767838	LOC_Os12g26880 // uclacyanin-2 precursor, putative, expressed
59	Os.10183.1.S2_at	Os.20580.1.S1_at	0.767834	LOC_Os02g55870 // heparanase-like protein 3 precursor, putative, expressed
60	Os.10183.1.S2_at	OsAffx.4214.1.S1_x_at	0.767643	LOC_Os04g59330 // expressed protein
61	Os.10183.1.S2_at	Os.12374.1.S1_at	0.767155	LOC_Os12g42876 // 5-methyltetrahydropteroyltriglutamate--homocysteine methyltransferase, putative, expressed
62	Os.10183.1.S2_at	Os.57465.1.S1_x_at	0.766463	LOC_Os03g28330 // sucrose synthase 2, putative, expressed
63	Os.10183.1.S2_at	Os.27822.1.A1_at	0.765408	LOC_Os04g47520 // auxin-independent growth promoter, putative, expressed
64	Os.10183.1.S2_at	Os.38245.1.S1_at	0.765382	LOC_Os01g22640 // alpha-L-fucosidase 2 precursor, putative, expressed
65	Os.10183.1.S2_at	Os.11677.2.S1_at	0.765046	LOC_Os05g03190 // IQD1, putative, expressed
66	Os.10183.1.S2_at	OsAffx.27508.94.S1_s_at	0.764471	LOC_Os09g17660 // expressed protein
67	Os.10183.1.S2_at	Os.18419.1.S1_at	0.76426	LOC_Os03g63450 // snRK1-interacting protein 1, putative, expressed
68	Os.10183.1.S2_at	Os.8597.1.S1_at	0.76408	LOC_Os03g02040 // remorin, putative, expressed
69	Os.10183.1.S2_at	Os.5837.1.S1_at	0.763393	LOC_Os02g47010 // SCAMP37, putative, expressed
70	Os.10183.1.S2_at	Os.6019.1.S1_at	0.762819	LOC_Os11g01570 // expressed protein
71	Os.10183.1.S2_at	Os.6839.1.S1_at	0.761917	LOC_Os01g45700 // expressed protein
72	Os.10183.1.S2_at	Os.17528.2.A1_a_at	0.75994	LOC_Os03g10500 // adenylyl-sulfate kinase, chloroplast precursor, putative, expressed
73	Os.10183.1.S2_at	Os.9015.1.S1_at	0.759596	LOC_Os01g73980 // xylem cysteine proteinase 2 precursor, putative, expressed
74	Os.10183.1.S2_at	OsAffx.3642.1.S1_s_at	0.759217	N/A // N/A
75	Os.10183.1.S2_at	Os.14525.1.S1_at	0.758193	LOC_Os07g44090 // myb-related protein Hv33, putative, expressed
76	Os.10183.1.S2_at	Os.54960.1.S1_at	0.756687	LOC_Os05g25540 // phytosulfokine receptor precursor, putative, expressed
77	Os.10183.1.S2_at	Os.25677.1.S1_at	0.755902	LOC_Os03g28330 // sucrose synthase 2, putative, expressed
78	Os.10183.1.S2_at	Os.7602.1.S1_at	0.755885	LOC_Os02g44108 // beta-expansin 4 precursor, putative, expressed
79	Os.10183.1.S2_at	Os.52482.1.S1_at	0.755429	LOC_Os07g36630 // CSLF8 - cellulose synthase-like family F; beta1,3;1,4 glucan synthase, expressed
80	Os.10183.1.S2_at	Os.21615.1.S1_at	0.754395	LOC_Os01g42880 // 3-N-debenzoyl-2-deoxytaxol N-benzoyltransferase, putative, expressed
81	Os.10183.1.S2_at	Os.1652.1.S1_at	0.754333	LOC_Os01g02139 // expressed protein
82	Os.10183.1.S2_at	Os.1653.1.S1_at	0.754174	LOC_Os01g02150 // sulfated surface glycoprotein 185 precursor, putative, expressed
83	Os.10183.1.S2_at	Os.47625.1.A1_s_at	0.752945	LOC_Os05g04500 // peroxidase 63 precursor, putative, expressed
84	Os.10183.1.S2_at	Os.6313.1.S1_at	0.752877	LOC_Os04g52370 // UDP-N-acetylglucosamine pyrophosphorylase, putative, expressed
85	Os.10183.1.S2_at	Os.9181.1.S1_x_at	0.752398	LOC_Os04g56290 // apospory-associated protein C, putative, expressed
86	Os.10183.1.S2_at	Os.27462.1.S1_at	0.751639	LOC_Os07g49240 // ATP binding protein, putative, expressed
87	Os.10183.1.S2_at	Os.10287.1.S1_at	0.751083	LOC_Os07g01370 // peroxidase 1 precursor, putative, expressed
88	Os.10183.1.S2_at	Os.35653.1.S1_a_at	0.749726	LOC_Os01g54590 // ras-related protein RIC2, putative, expressed
89	Os.10183.1.S2_at	Os.14134.1.S1_at	0.749693	LOC_Os03g08100 // catalytic/ hydrolase, putative, expressed
90	Os.10183.1.S2_at	Os.22241.1.S1_s_at	0.748367	LOC_Os11g41150 // SPR1, putative, expressed
91	Os.10183.1.S2_at	Os.2075.1.S1_at	0.748338	LOC_Os01g19220 // beta-D-xylosidase, putative, expressed
92	Os.10183.1.S2_at	Os.46852.1.S1_at	0.748327	LOC_Os10g41430 // nuc-1 negative regulatory protein preg, putative, expressed
93	Os.10183.1.S2_at	Os.30390.1.S1_at	0.748144	LOC_Os01g14960 // expressed protein
94	Os.10183.1.S2_at	Os.15713.1.S1_a_at	0.748127	LOC_Os04g42620 // protein binding protein, putative, expressed
95	Os.10183.1.S2_at	OsAffx.22754.1.S1_s_at	0.748	LOC_Os01g07410 // axi 1 protein, putative, expressed
96	Os.10183.1.S2_at	Os.7259.1.S1_at	0.747614	LOC_Os02g25060 // calcium lipid binding protein-like, putative, expressed
97	Os.10183.1.S2_at	Os.20262.1.S1_at	0.747292	LOC_Os05g03174 // glycosyltransferase, putative, expressed
98	Os.10183.1.S2_at	Os.50280.1.S1_at	0.746357	LOC_Os04g44850 // transferase, transferring glycosyl groups, putative, expressed
99	Os.10183.1.S2_at	Os.49509.1.S1_at	0.745985	LOC_Os08g44620 // expressed protein
100	Os.10183.1.S2_at	Os.50247.1.S1_s_at	0.744799	LOC_Os05g20050 // ras-related protein RGP2, putative, expressed

## Sheet: OsCESA3 co-expresstion top 100
NO	Probeset1	Probeset2	Correlation	Probeset2 Annotaion
1	Os.10178.1.S1_a_at	Os.10178.1.S1_a_at	1	LOC_Os07g24190 // CESA3 - cellulose synthase, expressed
2	Os.10178.1.S1_a_at	Os.4370.2.S1_x_at	0.868757	LOC_Os06g06780 // harpin-induced protein, putative, expressed
3	Os.10178.1.S1_a_at	Os.1726.1.S1_at	0.863669	LOC_Os01g18240 // MYB2, putative, expressed
4	Os.10178.1.S1_a_at	Os.23225.1.A1_at	0.859678	LOC_Os09g20880 // ATP binding protein, putative, expressed
5	Os.10178.1.S1_a_at	Os.55778.1.S1_at	0.857828	LOC_Os08g36540 // aspartic proteinase nepenthesin-1 precursor, putative, expressed
6	Os.10178.1.S1_a_at	Os.54620.1.A1_at	0.855063	LOC_Os12g38810 // expressed protein
7	Os.10178.1.S1_a_at	Os.12392.1.S1_at	0.853423	LOC_Os03g59210 // expressed protein
8	Os.10178.1.S1_a_at	Os.52940.1.S1_at	0.848169	LOC_Os12g05600 // catalytic/ hydrolase, putative, expressed
9	Os.10178.1.S1_a_at	Os.15918.1.S1_x_at	0.846949	LOC_Os03g63060 // wiscott-Aldrich syndrome, C-terminal, putative, expressed
10	Os.10178.1.S1_a_at	Os.8481.1.S1_a_at	0.845746	LOC_Os03g13460 // microtubule-associated protein MAP65-1a, putative, expressed
11	Os.10178.1.S1_a_at	Os.10178.2.S1_a_at	0.841181	LOC_Os07g24190 // CESA3 - cellulose synthase, expressed
12	Os.10178.1.S1_a_at	Os.51291.1.S1_at	0.832855	LOC_Os02g13980 // expressed protein
13	Os.10178.1.S1_a_at	Os.27703.1.S1_s_at	0.831943	LOC_Os09g13650 // expressed protein
14	Os.10178.1.S1_a_at	Os.35365.1.S1_at	0.828573	LOC_Os06g30950 // integral membrane protein like, putative, expressed
15	Os.10178.1.S1_a_at	Os.9514.1.S1_at	0.826579	LOC_Os05g04820 // MYB2, putative, expressed
16	Os.10178.1.S1_a_at	Os.10179.1.S1_at	0.825174	LOC_Os06g03640 // protein binding protein, putative, expressed
17	Os.10178.1.S1_a_at	Os.8562.1.S1_x_at	0.823958	LOC_Os11g02070 // TD and POZ domain-containing protein 2, putative, expressed
18	Os.10178.1.S1_a_at	Os.49544.1.S1_at	0.821095	LOC_Os09g07350 // fasciclin-like arabinogalactan protein 8 precursor, putative, expressed
19	Os.10178.1.S1_a_at	Os.8247.1.S1_at	0.819342	LOC_Os03g51150 // expressed protein
20	Os.10178.1.S1_a_at	Os.9679.1.S1_at	0.818035	LOC_Os11g07830 // dirigent-like protein pDIR9, putative, expressed
21	Os.10178.1.S1_a_at	Os.11586.1.S1_at	0.81117	LOC_Os06g49320 // glycosyltransferase, putative, expressed
22	Os.10178.1.S1_a_at	Os.6019.1.S1_at	0.804011	LOC_Os11g01570 // expressed protein
23	Os.10178.1.S1_a_at	Os.8555.1.S1_at	0.803539	LOC_Os05g06720 // esterase precursor, putative, expressed
24	Os.10178.1.S1_a_at	Os.50276.1.S1_at	0.801787	LOC_Os05g50510 // O-acetyltransferase, putative, expressed
25	Os.10178.1.S1_a_at	Os.7609.1.S1_at	0.801565	LOC_Os05g32110 // COBRA-like protein 4 precursor, putative, expressed
26	Os.10178.1.S1_a_at	Os.46549.1.S1_at	0.800219	LOC_Os10g30290 // anther-specific proline-rich protein APG precursor, putative, expressed
27	Os.10178.1.S1_a_at	Os.51575.1.S1_at	0.797989	LOC_Os05g28780 // expressed protein
28	Os.10178.1.S1_a_at	Os.8481.1.S2_a_at	0.795983	LOC_Os03g13460 // microtubule-associated protein MAP65-1a, putative, expressed
29	Os.10178.1.S1_a_at	Os.50750.1.S1_at	0.795934	LOC_Os03g02190 // receptor protein kinase CRINKLY4 precursor, putative, expressed
30	Os.10178.1.S1_a_at	Os.18599.1.S1_at	0.794944	LOC_Os03g57970 // lipid transfer protein, putative, expressed
31	Os.10178.1.S1_a_at	Os.162.1.S1_at	0.794285	LOC_Os05g20050 // ras-related protein RGP2, putative, expressed
32	Os.10178.1.S1_a_at	Os.18001.2.S1_x_at	0.792862	LOC_Os01g44040 // O-acetyltransferase, putative, expressed
33	Os.10178.1.S1_a_at	OsAffx.16707.1.S1_at	0.789679	LOC_Os07g44090 // myb-related protein Hv33, putative, expressed
34	Os.10178.1.S1_a_at	Os.7830.1.S1_at	0.788638	LOC_Os04g16970 // zinc finger, C3HC4 type family protein, expressed
35	Os.10178.1.S1_a_at	Os.52543.1.S1_at	0.787754	LOC_Os04g53580 // RIC10, putative, expressed
36	Os.10178.1.S1_a_at	Os.14525.1.S1_at	0.787558	LOC_Os07g44090 // myb-related protein Hv33, putative, expressed
37	Os.10178.1.S1_a_at	Os.7594.1.S1_at	0.786123	LOC_Os05g42000 // peroxidase 1 precursor, putative, expressed
38	Os.10178.1.S1_a_at	Os.18630.1.S1_at	0.784587	LOC_Os11g26190 // expressed protein
39	Os.10178.1.S1_a_at	Os.57195.1.S1_at	0.784257	LOC_Os03g19170 // expressed protein
40	Os.10178.1.S1_a_at	Os.37728.1.S1_x_at	0.783802	LOC_Os08g38170 // GMP synthase, putative, expressed
41	Os.10178.1.S1_a_at	Os.54424.1.S1_at	0.783746	LOC_Os01g42200 // expressed protein
42	Os.10178.1.S1_a_at	Os.25562.1.S1_at	0.782638	LOC_Os05g48270 // dopamine beta-monooxygenase, putative, expressed
43	Os.10178.1.S1_a_at	Os.9808.1.S1_at	0.781672	LOC_Os05g13900 // myeloid/lymphoid or mixed-lineage leukemia protein 2, putative, expressed
44	Os.10178.1.S1_a_at	Os.22241.1.S1_s_at	0.781299	LOC_Os11g41150 // SPR1, putative, expressed
45	Os.10178.1.S1_a_at	Os.10701.1.S1_at	0.779471	LOC_Os03g52630 // endo-1,4-beta-glucanase Cel1, putative, expressed
46	Os.10178.1.S1_a_at	Os.10079.1.S1_at	0.77945	LOC_Os03g13820 // ATP binding protein, putative, expressed
47	Os.10178.1.S1_a_at	OsAffx.29513.1.S1_at	0.779425	LOC_Os08g34700 // GDU1, putative, expressed
48	Os.10178.1.S1_a_at	Os.51213.1.S1_at	0.778627	LOC_Os03g18370 // ATP binding protein, putative, expressed
49	Os.10178.1.S1_a_at	Os.12549.1.S1_s_at	0.777846	LOC_Os11g01740 // BRASSINOSTEROID INSENSITIVE 1-associated receptor kinase 1 precursor, putative, expressed
50	Os.10178.1.S1_a_at	Os.10525.1.S1_at	0.777489	LOC_Os10g12750 // expressed protein
51	Os.10178.1.S1_a_at	OsAffx.9099.1.S1_x_at	0.7771	LOC_Os01g44130 // aspartic proteinase oryzasin-1 precursor, putative, expressed
52	Os.10178.1.S1_a_at	Os.10772.1.S1_at	0.776968	LOC_Os06g06250 // alpha-L-fucosidase 2 precursor, putative, expressed
53	Os.10178.1.S1_a_at	Os.27703.1.S1_a_at	0.776194	LOC_Os09g13650 // expressed protein
54	Os.10178.1.S1_a_at	Os.57130.1.S1_at	0.775576	LOC_Os06g46754 // RIC10, putative, expressed
55	Os.10178.1.S1_a_at	Os.6313.1.S1_at	0.774853	LOC_Os04g52370 // UDP-N-acetylglucosamine pyrophosphorylase, putative, expressed
56	Os.10178.1.S1_a_at	OsAffx.13093.1.S1_x_at	0.774669	LOC_Os03g28190 // dirigent-like protein pDIR17, putative, expressed
57	Os.10178.1.S1_a_at	Os.7097.2.S1_a_at	0.774538	LOC_Os02g48900 // aspartic proteinase nepenthesin-1 precursor, putative, expressed
58	Os.10178.1.S1_a_at	Os.5987.1.S1_at	0.774412	LOC_Os05g32500 // expressed protein
59	Os.10178.1.S1_a_at	Os.52194.1.S1_at	0.774406	LOC_Os02g58480 // sucrose synthase 2, putative, expressed
60	Os.10178.1.S1_a_at	Os.9673.1.S1_at	0.774162	LOC_Os08g40420 // ternary complex factor MIP1, putative, expressed
61	Os.10178.1.S1_a_at	Os.12399.1.S1_at	0.773559	LOC_Os09g32080 // endochitinase A2 precursor, putative, expressed
62	Os.10178.1.S1_a_at	Os.20262.1.S1_at	0.772767	LOC_Os05g03174 // glycosyltransferase, putative, expressed
63	Os.10178.1.S1_a_at	OsAffx.19841.1.S1_at	0.772457	LOC_Os12g26880 // uclacyanin-2 precursor, putative, expressed
64	Os.10178.1.S1_a_at	Os.12549.1.S1_at	0.770577	LOC_Os11g01740 // BRASSINOSTEROID INSENSITIVE 1-associated receptor kinase 1 precursor, putative, expressed
65	Os.10178.1.S1_a_at	Os.11202.1.S1_at	0.77032	LOC_Os08g06100 // quercetin 3-O-methyltransferase 1, putative, expressed
66	Os.10178.1.S1_a_at	Os.8621.1.S1_a_at	0.770027	LOC_Os08g37300 // mucin-2 precursor, putative, expressed
67	Os.10178.1.S1_a_at	Os.51533.1.S1_at	0.767951	LOC_Os06g34650 // RING-H2 finger protein ATL2L, putative, expressed
68	Os.10178.1.S1_a_at	Os.50054.1.S1_x_at	0.767707	LOC_Os06g04090 // NAM protein, putative, expressed
69	Os.10178.1.S1_a_at	Os.23248.1.A1_at	0.766394	LOC_Os04g46560 // malate dehydrogenase, cytoplasmic, putative, expressed
70	Os.10178.1.S1_a_at	Os.10576.1.S1_at	0.763905	LOC_Os02g33550 // VAMP protein SEC22, putative, expressed
71	Os.10178.1.S1_a_at	Os.8919.2.S1_x_at	0.76373	LOC_Os01g67190 // ribonuclease 2 precursor, putative, expressed
72	Os.10178.1.S1_a_at	OsAffx.4056.1.S1_at	0.763687	LOC_Os04g42310 // K+ channel tetramerisation domain containing protein, expressed
73	Os.10178.1.S1_a_at	Os.10287.1.S1_at	0.763346	LOC_Os07g01370 // peroxidase 1 precursor, putative, expressed
74	Os.10178.1.S1_a_at	Os.37660.1.S1_at	0.76303	LOC_Os04g54870 // RNA recognition motif containing protein, putative, expressed
75	Os.10178.1.S1_a_at	Os.10772.1.S1_x_at	0.762104	LOC_Os06g06250 // alpha-L-fucosidase 2 precursor, putative, expressed
76	Os.10178.1.S1_a_at	Os.14530.2.S1_x_at	0.761887	LOC_Os09g36880 // anther-specific proline-rich protein APG precursor, putative, expressed
77	Os.10178.1.S1_a_at	OsAffx.7566.1.S1_at	0.760857	LOC_Os12g12470 // NADP-dependent oxidoreductase P1, putative, expressed
78	Os.10178.1.S1_a_at	Os.8475.2.S1_at	0.760753	LOC_Os08g38170 // GMP synthase, putative, expressed
79	Os.10178.1.S1_a_at	Os.49701.1.S1_at	0.758969	LOC_Os04g33990 // VAMP protein SEC22, putative, expressed
80	Os.10178.1.S1_a_at	Os.47625.1.A1_s_at	0.758278	LOC_Os05g04500 // peroxidase 63 precursor, putative, expressed
81	Os.10178.1.S1_a_at	Os.4370.1.S1_at	0.758041	LOC_Os06g06780 // harpin-induced protein, putative, expressed
82	Os.10178.1.S1_a_at	Os.35495.1.S1_at	0.757843	LOC_Os01g16030 // ADP-ribosylation factor, putative, expressed
83	Os.10178.1.S1_a_at	Os.25233.1.S1_x_at	0.757072	LOC_Os01g40200 // XIK, putative, expressed
84	Os.10178.1.S1_a_at	Os.35495.1.S1_s_at	0.756145	LOC_Os01g16030 // ADP-ribosylation factor, putative, expressed
85	Os.10178.1.S1_a_at	Os.4987.1.S1_at	0.754933	LOC_Os04g14680 // OsAPx3 - Peroxisomal Ascorbate Peroxidase encoding gene, expressed
86	Os.10178.1.S1_a_at	Os.49369.1.S1_at	0.754556	LOC_Os06g42800 // ATP binding protein, putative, expressed
87	Os.10178.1.S1_a_at	Os.50969.1.S1_at	0.753977	LOC_Os03g46150 // protease inhibitor/seed storage/LTP family protein, expressed
88	Os.10178.1.S1_a_at	Os.5214.1.S2_at	0.7536	LOC_Os05g32130 // conserved hypothetical protein
89	Os.10178.1.S1_a_at	Os.25849.3.S1_x_at	0.753116	LOC_Os01g66970 // zinc finger protein, putative, expressed
90	Os.10178.1.S1_a_at	OsAffx.22754.1.S1_x_at	0.752589	LOC_Os01g07410 // axi 1 protein, putative, expressed
91	Os.10178.1.S1_a_at	Os.14160.1.S1_at	0.751962	LOC_Os02g40100 // expressed protein
92	Os.10178.1.S1_a_at	Os.6801.2.S1_x_at	0.750628	LOC_Os02g02040 // protein kinase, putative, expressed
93	Os.10178.1.S1_a_at	Os.4614.2.S1_x_at	0.750614	LOC_Os02g40260 // protein binding protein, putative, expressed
94	Os.10178.1.S1_a_at	Os.34987.1.A1_a_at	0.750574	LOC_Os05g39520 // ankyrin-like protein, putative, expressed
95	Os.10178.1.S1_a_at	Os.9893.1.S1_at	0.750524	LOC_Os03g13200 // peroxidase 53 precursor, putative, expressed
96	Os.10178.1.S1_a_at	OsAffx.31542.1.S1_x_at	0.749252	LOC_Os12g01740 // BRASSINOSTEROID INSENSITIVE 1-associated receptor kinase 1 precursor, putative, expressed
97	Os.10178.1.S1_a_at	Os.20580.1.S1_at	0.746273	LOC_Os02g55870 // heparanase-like protein 3 precursor, putative, expressed
98	Os.10178.1.S1_a_at	Os.27822.2.S1_s_at	0.745519	LOC_Os04g47520 // auxin-independent growth promoter, putative, expressed
99	Os.10178.1.S1_a_at	OsAffx.17415.1.S1_at	0.745164	LOC_Os08g39320 // hypothetical protein
100	Os.10178.1.S1_a_at	Os.11469.1.S1_at	0.744375	LOC_Os04g26870 // auxin-induced protein PCNT115, putative, expressed

## Sheet: OsCESA5 co-expresstion top 100
NO	Probeset1	Probeset2	Correlation	Probeset2 Annotaion
1	Os.4857.1.S1_at	Os.4857.1.S1_at	1	LOC_Os03g62090 // CESA5 - cellulose synthase, expressed
2	Os.4857.1.S1_at	Os.8963.1.S1_at	0.782988	LOC_Os01g21960 // BRASSINOSTEROID INSENSITIVE 1-associated receptor kinase 1 precursor, putative, expressed
3	Os.4857.1.S1_at	Os.10926.1.S1_at	0.777952	LOC_Os07g14850 // CESA6 - cellulose synthase, expressed
4	Os.4857.1.S1_at	Os.9211.1.S1_at	0.759732	LOC_Os07g45060 // GPI-anchored protein At5g19240 precursor, putative, expressed
5	Os.4857.1.S1_at	Os.5987.1.S1_at	0.750142	LOC_Os05g32500 // expressed protein
6	Os.4857.1.S1_at	Os.49180.1.S1_at	0.745465	LOC_Os05g50910 // expressed protein
7	Os.4857.1.S1_at	Os.7186.1.S1_at	0.738939	LOC_Os07g44350 // novel plant SNARE 11, putative, expressed
8	Os.4857.1.S1_at	Os.9709.2.S1_at	0.731163	LOC_Os08g06380 // CSLF6 - cellulose synthase-like family F; beta1,3;1,4 glucan synthase, expressed
9	Os.4857.1.S1_at	Os.7098.1.S1_at	0.730931	LOC_Os05g01810 // xylem cysteine proteinase 2 precursor, putative, expressed
10	Os.4857.1.S1_at	Os.21812.2.S1_a_at	0.730728	LOC_Os03g12250 // atypical receptor-like kinase MARK, putative, expressed
11	Os.4857.1.S1_at	OsAffx.23081.1.S1_at	0.726849	N/A // N/A
12	Os.4857.1.S1_at	Os.54684.1.S1_at	0.724089	LOC_Os03g18980 // kinesin-4, putative, expressed
13	Os.4857.1.S1_at	Os.51065.1.S1_at	0.715676	LOC_Os09g35630 // protein binding protein, putative, expressed
14	Os.4857.1.S1_at	Os.8026.1.S1_at	0.714488	LOC_Os11g47330 // ATP-citrate synthase, putative, expressed
15	Os.4857.1.S1_at	Os.10183.1.S2_at	0.707789	LOC_Os05g08370 // CESA1 - cellulose synthase, expressed
16	Os.4857.1.S1_at	Os.5095.1.S1_at	0.706897	LOC_Os07g40130 // transcriptional regulatory protein algP, putative
17	Os.4857.1.S1_at	Os.20425.2.S1_x_at	0.706887	LOC_Os12g25700 // UDP-glucose 6-dehydrogenase, putative, expressed
18	Os.4857.1.S1_at	Os.10474.1.S1_s_at	0.704695	LOC_Os05g33270 // esterase precursor, putative, expressed
19	Os.4857.1.S1_at	Os.7521.1.S1_at	0.700655	LOC_Os06g11990 // armadillo/beta-catenin-like repeat family protein, expressed
20	Os.4857.1.S1_at	Os.10287.1.S1_at	0.699976	LOC_Os07g01370 // peroxidase 1 precursor, putative, expressed
21	Os.4857.1.S1_at	Os.17189.1.S1_at	0.697373	LOC_Os05g44070 // ras-related protein RIC2, putative, expressed
22	Os.4857.1.S1_at	Os.54090.1.S1_at	0.696802	LOC_Os08g29200 // polygalacturonase-1 non-catalytic beta subunit precursor, putative, expressed
23	Os.4857.1.S1_at	Os.48101.1.S1_at	0.696436	LOC_Os04g54810 // beta-D-xylosidase, putative, expressed
24	Os.4857.1.S1_at	Os.28002.1.S1_at	0.695965	LOC_Os08g35710 // expressed protein
25	Os.4857.1.S1_at	OsAffx.4214.1.S1_x_at	0.695918	LOC_Os04g59330 // expressed protein
26	Os.4857.1.S1_at	Os.57080.1.S1_at	0.693176	LOC_Os12g22600 // asparaginyl-tRNA synthetase, cytoplasmic 2, putative, expressed
27	Os.4857.1.S1_at	Os.7295.1.S1_at	0.691455	LOC_Os02g07410 // glycine cleavage system H protein, mitochondrial precursor, putative, expressed
28	Os.4857.1.S1_at	Os.6313.1.S1_at	0.687641	LOC_Os04g52370 // UDP-N-acetylglucosamine pyrophosphorylase, putative, expressed
29	Os.4857.1.S1_at	Os.5208.1.S1_at	0.686667	LOC_Os06g36050 // expressed protein
30	Os.4857.1.S1_at	Os.52482.1.S1_at	0.685819	LOC_Os07g36630 // CSLF8 - cellulose synthase-like family F; beta1,3;1,4 glucan synthase, expressed
31	Os.4857.1.S1_at	Os.50280.1.S1_at	0.684395	LOC_Os04g44850 // transferase, transferring glycosyl groups, putative, expressed
32	Os.4857.1.S1_at	Os.51815.2.S1_x_at	0.68405	LOC_Os02g32650 // expressed protein
33	Os.4857.1.S1_at	Os.5514.1.S1_at	0.683725	LOC_Os04g56740 // IQ calmodulin-binding motif family protein, expressed
34	Os.4857.1.S1_at	Os.6247.1.S1_at	0.683594	LOC_Os09g36350 // endoglucanase 1 precursor, putative, expressed
35	Os.4857.1.S1_at	Os.28036.1.S1_x_at	0.682713	LOC_Os03g45340 // small heat shock-like protein, putative, expressed
36	Os.4857.1.S1_at	Os.9178.1.S1_at	0.682228	LOC_Os11g07670 // disease resistance response protein 206, putative, expressed
37	Os.4857.1.S1_at	Os.5883.1.S1_at	0.682178	LOC_Os04g01500 // expressed protein
38	Os.4857.1.S1_at	OsAffx.18415.1.S1_x_at	0.681185	LOC_Os10g26500 // homeodomain-leucine zipper transcription factor TaHDZipI-2, putative
39	Os.4857.1.S1_at	Os.12338.1.S1_at	0.680766	LOC_Os05g42330 // SC3 protein, putative, expressed
40	Os.4857.1.S1_at	Os.11520.1.S1_at	0.679144	LOC_Os05g12580 // AGP20, putative
41	Os.4857.1.S1_at	Os.18474.1.S1_at	0.678719	LOC_Os04g41810 // dopamine beta-monooxygenase, putative, expressed
42	Os.4857.1.S1_at	Os.5908.1.S1_at	0.677305	LOC_Os01g47780 // fasciclin-like arabinogalactan protein 7 precursor, putative, expressed
43	Os.4857.1.S1_at	Os.57465.1.S1_x_at	0.676551	LOC_Os03g28330 // sucrose synthase 2, putative, expressed
44	Os.4857.1.S1_at	Os.8175.1.S1_at	0.675467	LOC_Os07g43990 // expressed protein
45	Os.4857.1.S1_at	Os.14770.1.S1_at	0.675341	LOC_Os03g17760 // RNA recognition motif family protein, expressed
46	Os.4857.1.S1_at	Os.18511.1.S1_s_at	0.672549	LOC_Os10g07210 // hsp20/alpha crystallin family protein, expressed
47	Os.4857.1.S1_at	Os.2075.1.S1_at	0.672218	LOC_Os01g19220 // beta-D-xylosidase, putative, expressed
48	Os.4857.1.S1_at	Os.5099.1.S1_at	0.670463	LOC_Os10g39170 // peroxidase 1 precursor, putative, expressed
49	Os.4857.1.S1_at	Os.7916.1.S1_at	0.668104	LOC_Os01g59150 // tubulin beta-4 chain, putative, expressed
50	Os.4857.1.S1_at	Os.5746.1.S1_at	0.667718	LOC_Os03g56380 // ankyrin-like protein, putative, expressed
51	Os.4857.1.S1_at	Os.14078.1.S1_s_at	0.667628	LOC_Os10g07210 // hsp20/alpha crystallin family protein, expressed
52	Os.4857.1.S1_at	Os.55554.1.S1_at	0.667269	LOC_Os08g38270 // fasciclin-like arabinogalactan protein 10 precursor, putative, expressed
53	Os.4857.1.S1_at	Os.9037.1.S1_at	0.667118	LOC_Os01g50010 // clathrin assembly protein, putative, expressed
54	Os.4857.1.S1_at	Os.6656.1.S1_at	0.667023	LOC_Os02g18410 // DREPP2 protein, putative, expressed
55	Os.4857.1.S1_at	Os.8314.1.S1_at	0.666512	LOC_Os04g59330 // expressed protein
56	Os.4857.1.S1_at	Os.25677.1.S1_at	0.666368	LOC_Os03g28330 // sucrose synthase 2, putative, expressed
57	Os.4857.1.S1_at	Os.49496.1.S1_at	0.66614	LOC_Os06g46500 // L-ascorbate oxidase homolog precursor, putative, expressed
58	Os.4857.1.S1_at	OsAffx.23728.1.S1_at	0.665308	LOC_Os01g49660 // seed maturation protein, putative
59	Os.4857.1.S1_at	OsAffx.2611.1.S1_at	0.664751	LOC_Os02g14910 // bZIP transcription factor family protein, expressed
60	Os.4857.1.S1_at	Os.28036.1.S1_at	0.66441	N/A // N/A
61	Os.4857.1.S1_at	Os.7940.1.S1_at	0.664032	LOC_Os06g34120 // esterase precursor, putative, expressed
62	Os.4857.1.S1_at	Os.47492.1.A1_s_at	0.663752	LOC_Os02g40430 // HEAT repeat family protein, expressed
63	Os.4857.1.S1_at	Os.24753.1.S1_at	0.662837	LOC_Os09g28720 // gibberellin receptor GID1L2, putative, expressed
64	Os.4857.1.S1_at	Os.25414.1.S1_at	0.662613	LOC_Os07g30810 // permease, putative, expressed
65	Os.4857.1.S1_at	Os.27995.1.A1_at	0.661985	LOC_Os05g33220 // plasma membrane associated protein, putative, expressed
66	Os.4857.1.S1_at	Os.8799.1.S1_at	0.661875	LOC_Os02g05680 // disulfide oxidoreductase/ electron carrier/ oxidoreductase, putative, expressed
67	Os.4857.1.S1_at	Os.8688.1.S1_a_at	0.661066	LOC_Os07g26440 // CIP7, putative, expressed
68	Os.4857.1.S1_at	Os.167.1.S1_at	0.659838	LOC_Os06g08080 // pyrophosphate-energized vacuolar membrane proton pump, putative, expressed
69	Os.4857.1.S1_at	Os.24496.1.S1_at	0.659224	LOC_Os01g13490 // expressed protein
70	Os.4857.1.S1_at	Os.20580.1.S1_at	0.659117	LOC_Os02g55870 // heparanase-like protein 3 precursor, putative, expressed
71	Os.4857.1.S1_at	Os.9514.1.S1_at	0.658897	LOC_Os05g04820 // MYB2, putative, expressed
72	Os.4857.1.S1_at	Os.12866.1.S1_at	0.65824	LOC_Os02g48360 // pyrophosphate--fructose 6-phosphate 1-phosphotransferase alpha subunit, putative, expressed
73	Os.4857.1.S1_at	Os.30390.1.S1_at	0.658184	LOC_Os01g14960 // expressed protein
74	Os.4857.1.S1_at	Os.15803.1.S1_at	0.656812	LOC_Os02g49950 // spotted leaf protein 11, putative, expressed
75	Os.4857.1.S1_at	OsAffx.5056.1.S1_x_at	0.655686	LOC_Os06g38970 // ATP binding protein, putative, expressed
76	Os.4857.1.S1_at	Os.26531.1.S1_s_at	0.655649	LOC_Os02g06840 // beta-1,3-galactosyltransferase sqv-2, putative, expressed
77	Os.4857.1.S1_at	Os.9731.1.S1_at	0.655571	LOC_Os12g36810 // polygalacturonase, putative, expressed
78	Os.4857.1.S1_at	OsAffx.27508.94.S1_s_at	0.655463	LOC_Os09g17660 // expressed protein
79	Os.4857.1.S1_at	Os.46585.1.S1_at	0.655258	LOC_Os10g42280 // cyclase/dehydrase family protein, putative, expressed
80	Os.4857.1.S1_at	Os.54857.1.S1_at	0.655129	LOC_Os02g56750 // ATPP2-B1, putative, expressed
81	Os.4857.1.S1_at	Os.8244.1.S1_at	0.654974	LOC_Os04g43490 // casein kinase I isoform delta-like, putative, expressed
82	Os.4857.1.S1_at	OsAffx.5131.1.S1_at	0.654766	N/A // N/A
83	Os.4857.1.S1_at	Os.10695.1.S1_s_at	0.654389	LOC_Os02g53790 // uridylate kinase, putative, expressed
84	Os.4857.1.S1_at	Os.50118.1.S1_at	0.653016	LOC_Os03g03860 // expressed protein
85	Os.4857.1.S1_at	Os.20425.2.S1_at	0.651936	LOC_Os12g25700 // UDP-glucose 6-dehydrogenase, putative, expressed
86	Os.4857.1.S1_at	Os.7393.1.S1_at	0.65158	LOC_Os07g02200 // blue copper protein precursor, putative, expressed
87	Os.4857.1.S1_at	Os.16047.1.S1_at	0.65119	LOC_Os01g70410 // receptor protein kinase CRINKLY4 precursor, putative, expressed
88	Os.4857.1.S1_at	Os.50389.1.S1_at	0.650989	LOC_Os08g42870 // expressed protein
89	Os.4857.1.S1_at	Os.53685.1.S1_at	0.650854	LOC_Os05g36960 // ATP binding protein, putative, expressed
90	Os.4857.1.S1_at	Os.14525.1.S1_at	0.650771	LOC_Os07g44090 // myb-related protein Hv33, putative, expressed
91	Os.4857.1.S1_at	Os.32644.1.S1_at	0.650482	LOC_Os03g03570 // ATP binding protein, putative, expressed
92	Os.4857.1.S1_at	Os.51840.1.S1_at	0.64976	LOC_Os09g23360 // expressed protein
93	Os.4857.1.S1_at	Os.51744.1.A1_at	0.649389	LOC_Os08g01690 // vegetative cell wall protein gp1 precursor, putative, expressed
94	Os.4857.1.S1_at	Os.47948.1.S1_at	0.64914	LOC_Os02g51280 // TCP-domain protein, putative, expressed
95	Os.4857.1.S1_at	Os.41641.1.S1_x_at	0.648241	LOC_Os01g50010 // clathrin assembly protein, putative, expressed
96	Os.4857.1.S1_at	OsAffx.6066.1.S1_s_at	0.648097	LOC_Os08g38270 // fasciclin-like arabinogalactan protein 10 precursor, putative, expressed
97	Os.4857.1.S1_at	Os.28229.1.S1_at	0.648065	LOC_Os01g52770 // anther-specific proline-rich protein APG, putative, expressed
98	Os.4857.1.S1_at	Os.57060.1.S1_at	0.647827	LOC_Os09g27250 // plant viral-response family protein, expressed
99	Os.4857.1.S1_at	Os.51815.2.S1_at	0.647552	LOC_Os02g32650 // expressed protein
100	Os.4857.1.S1_at	Os.20425.1.S1_at	0.647357	LOC_Os12g25700 // UDP-glucose 6-dehydrogenase, putative, expressed

## Sheet: OsCESA8 co-expresstion top 100
NO	Probeset1	Probeset2	Correlation	Probeset2 Annotaion
1	Os.10176.1.S1_at	Os.10176.1.S1_at	1	LOC_Os07g10770 // CESA8 - cellulose synthase, expressed
2	Os.10176.1.S1_at	Os.10183.1.S2_at	0.935347	LOC_Os05g08370 // CESA1 - cellulose synthase, expressed
3	Os.10176.1.S1_at	Os.12399.1.S1_at	0.926678	LOC_Os09g32080 // endochitinase A2 precursor, putative, expressed
4	Os.10176.1.S1_at	Os.7609.1.S1_at	0.915078	LOC_Os05g32110 // COBRA-like protein 4 precursor, putative, expressed
5	Os.10176.1.S1_at	Os.9709.2.S1_at	0.908972	LOC_Os08g06380 // CSLF6 - cellulose synthase-like family F; beta1,3;1,4 glucan synthase, expressed
6	Os.10176.1.S1_at	Os.5987.1.S1_at	0.894841	LOC_Os05g32500 // expressed protein
7	Os.10176.1.S1_at	Os.10179.1.S1_at	0.894358	LOC_Os06g03640 // protein binding protein, putative, expressed
8	Os.10176.1.S1_at	Os.49544.1.S1_at	0.888932	LOC_Os09g07350 // fasciclin-like arabinogalactan protein 8 precursor, putative, expressed
9	Os.10176.1.S1_at	Os.53704.1.S1_x_at	0.88697	LOC_Os05g48900 // fasciclin-like arabinogalactan protein 7 precursor, putative, expressed
10	Os.10176.1.S1_at	Os.37225.1.S1_at	0.878326	LOC_Os07g27810 // fiber protein Fb34, putative, expressed
11	Os.10176.1.S1_at	Os.28002.1.S1_at	0.87459	LOC_Os08g35710 // expressed protein
12	Os.10176.1.S1_at	Os.49701.1.S1_at	0.871562	LOC_Os04g33990 // VAMP protein SEC22, putative, expressed
13	Os.10176.1.S1_at	Os.6247.1.S1_at	0.862719	LOC_Os09g36350 // endoglucanase 1 precursor, putative, expressed
14	Os.10176.1.S1_at	Os.10701.1.S1_at	0.862397	LOC_Os03g52630 // endo-1,4-beta-glucanase Cel1, putative, expressed
15	Os.10176.1.S1_at	Os.162.1.S1_at	0.855657	LOC_Os05g20050 // ras-related protein RGP2, putative, expressed
16	Os.10176.1.S1_at	Os.12780.1.S1_at	0.852676	LOC_Os08g02120 // fructokinase-2, putative, expressed
17	Os.10176.1.S1_at	OsAffx.14314.1.S1_x_at	0.850006	LOC_Os04g47520 // auxin-independent growth promoter, putative, expressed
18	Os.10176.1.S1_at	Os.7758.1.S1_at	0.849588	LOC_Os02g10480 // GTPase activating protein, putative, expressed
19	Os.10176.1.S1_at	Os.8314.1.S1_at	0.848481	LOC_Os04g59330 // expressed protein
20	Os.10176.1.S1_at	Os.10576.1.S1_at	0.846784	LOC_Os02g33550 // VAMP protein SEC22, putative, expressed
21	Os.10176.1.S1_at	Os.5843.1.S1_at	0.846606	LOC_Os06g46799 // peroxidase 39 precursor, putative, expressed
22	Os.10176.1.S1_at	Os.50014.1.S1_at	0.845301	LOC_Os03g38050 // beta-1,3-galactosyltransferase sqv-2, putative, expressed
23	Os.10176.1.S1_at	Os.5881.1.S1_at	0.841907	LOC_Os05g19030 // expressed protein
24	Os.10176.1.S1_at	Os.9231.1.S1_at	0.836203	LOC_Os04g01300 // transmembrane protein 115, putative, expressed
25	Os.10176.1.S1_at	Os.9181.1.S1_x_at	0.835979	LOC_Os04g56290 // apospory-associated protein C, putative, expressed
26	Os.10176.1.S1_at	Os.4619.1.S1_at	0.833178	N/A // N/A
27	Os.10176.1.S1_at	Os.52598.1.S1_at	0.831477	LOC_Os07g07340 // glucan endo-1,3-beta-glucosidase 5 precursor, putative, expressed
28	Os.10176.1.S1_at	Os.5746.1.S1_at	0.831354	LOC_Os03g56380 // ankyrin-like protein, putative, expressed
29	Os.10176.1.S1_at	Os.5908.1.S1_at	0.826701	LOC_Os01g47780 // fasciclin-like arabinogalactan protein 7 precursor, putative, expressed
30	Os.10176.1.S1_at	Os.5837.1.S1_at	0.826204	LOC_Os02g47010 // SCAMP37, putative, expressed
31	Os.10176.1.S1_at	Os.10151.1.S1_at	0.825518	LOC_Os11g26860 // serine hydroxymethyltransferase, mitochondrial precursor, putative, expressed
32	Os.10176.1.S1_at	Os.329.1.S1_at	0.825455	LOC_Os04g55670 // glycosyltransferase, putative, expressed
33	Os.10176.1.S1_at	Os.50276.1.S1_at	0.819552	LOC_Os05g50510 // O-acetyltransferase, putative, expressed
34	Os.10176.1.S1_at	Os.1653.1.S1_at	0.816873	LOC_Os01g02150 // sulfated surface glycoprotein 185 precursor, putative, expressed
35	Os.10176.1.S1_at	Os.54960.1.S1_at	0.816594	LOC_Os05g25540 // phytosulfokine receptor precursor, putative, expressed
36	Os.10176.1.S1_at	Os.18736.1.S1_at	0.816042	LOC_Os01g70200 // secondary cell wall-related glycosyltransferase family 47, putative, expressed
37	Os.10176.1.S1_at	Os.9316.1.S1_at	0.815586	LOC_Os06g47220 // expressed protein
38	Os.10176.1.S1_at	Os.5832.1.S1_at	0.814862	LOC_Os01g64490 // ATP binding protein, putative, expressed
39	Os.10176.1.S1_at	Os.9514.1.S1_at	0.813587	LOC_Os05g04820 // MYB2, putative, expressed
40	Os.10176.1.S1_at	Os.6839.1.S1_at	0.811405	LOC_Os01g45700 // expressed protein
41	Os.10176.1.S1_at	Os.10473.1.S1_at	0.810708	LOC_Os12g25690 // UDP-glucose 6-dehydrogenase, putative, expressed
42	Os.10176.1.S1_at	OsAffx.4214.1.S1_x_at	0.809217	LOC_Os04g59330 // expressed protein
43	Os.10176.1.S1_at	Os.1652.1.S1_at	0.807543	LOC_Os01g02139 // expressed protein
44	Os.10176.1.S1_at	Os.5927.1.S1_at	0.806897	LOC_Os03g63540 // expressed in cucumber hypocotyls, putative, expressed
45	Os.10176.1.S1_at	Os.11677.1.S1_x_at	0.80527	LOC_Os05g03190 // IQD1, putative, expressed
46	Os.10176.1.S1_at	Os.8597.1.S1_at	0.803209	LOC_Os03g02040 // remorin, putative, expressed
47	Os.10176.1.S1_at	Os.9835.1.S1_a_at	0.803162	LOC_Os01g62020 // UDP-glucuronic acid decarboxylase 1, putative, expressed
48	Os.10176.1.S1_at	Os.5826.2.S1_a_at	0.803112	LOC_Os03g03600 // fasciclin-like arabinogalactan protein 8 precursor, putative, expressed
49	Os.10176.1.S1_at	Os.1437.1.S1_at	0.802589	LOC_Os01g06580 // fasciclin-like arabinogalactan protein 7 precursor, putative, expressed
50	Os.10176.1.S1_at	Os.12288.1.S1_at	0.800751	LOC_Os08g13920 // xyloglucan endotransglycosylase/hydrolase protein 8 precursor, putative, expressed
51	Os.10176.1.S1_at	Os.27465.1.S1_at	0.800573	LOC_Os03g18890 // transferase, transferring glycosyl groups, putative, expressed
52	Os.10176.1.S1_at	Os.20262.1.S1_at	0.799346	LOC_Os05g03174 // glycosyltransferase, putative, expressed
53	Os.10176.1.S1_at	Os.21615.1.S1_at	0.798497	LOC_Os01g42880 // 3-N-debenzoyl-2-deoxytaxol N-benzoyltransferase, putative, expressed
54	Os.10176.1.S1_at	Os.18419.1.S1_at	0.797484	LOC_Os03g63450 // snRK1-interacting protein 1, putative, expressed
55	Os.10176.1.S1_at	Os.9178.1.S1_at	0.796051	LOC_Os11g07670 // disease resistance response protein 206, putative, expressed
56	Os.10176.1.S1_at	OsAffx.28851.1.S1_s_at	0.791969	LOC_Os07g41050 // VEP1, putative, expressed
57	Os.10176.1.S1_at	Os.23225.1.A1_at	0.791081	LOC_Os09g20880 // ATP binding protein, putative, expressed
58	Os.10176.1.S1_at	Os.24594.1.A1_s_at	0.79087	LOC_Os08g30070 // expressed protein
59	Os.10176.1.S1_at	Os.5913.1.S1_at	0.790367	LOC_Os04g57970 // expressed protein
60	Os.10176.1.S1_at	Os.20580.1.S1_at	0.789261	LOC_Os02g55870 // heparanase-like protein 3 precursor, putative, expressed
61	Os.10176.1.S1_at	Os.23100.1.S1_at	0.788849	LOC_Os07g37310 // uncharacterized secreted protein, putative, expressed
62	Os.10176.1.S1_at	Os.12751.1.S1_at	0.786923	LOC_Os02g48470 // expressed protein
63	Os.10176.1.S1_at	Os.47625.1.A1_s_at	0.785373	LOC_Os05g04500 // peroxidase 63 precursor, putative, expressed
64	Os.10176.1.S1_at	Os.18474.1.S1_at	0.78533	LOC_Os04g41810 // dopamine beta-monooxygenase, putative, expressed
65	Os.10176.1.S1_at	OsAffx.23081.1.S1_at	0.784164	N/A // N/A
66	Os.10176.1.S1_at	Os.14525.1.S1_at	0.78308	LOC_Os07g44090 // myb-related protein Hv33, putative, expressed
67	Os.10176.1.S1_at	Os.9015.1.S1_at	0.783057	LOC_Os01g73980 // xylem cysteine proteinase 2 precursor, putative, expressed
68	Os.10176.1.S1_at	Os.10428.1.S1_at	0.782592	LOC_Os02g14170 // peroxidase precursor, putative, expressed
69	Os.10176.1.S1_at	Os.27462.1.S1_at	0.782361	LOC_Os07g49240 // ATP binding protein, putative, expressed
70	Os.10176.1.S1_at	OsAffx.19841.1.S1_at	0.782122	LOC_Os12g26880 // uclacyanin-2 precursor, putative, expressed
71	Os.10176.1.S1_at	Os.26479.1.A1_a_at	0.782002	LOC_Os01g72430 // NADPH quinone oxidoreductase 1, putative, expressed
72	Os.10176.1.S1_at	Os.14232.1.S1_at	0.781156	LOC_Os01g46120 // esterase precursor, putative, expressed
73	Os.10176.1.S1_at	Os.9072.1.S1_at	0.780999	LOC_Os11g30360 // expressed protein
74	Os.10176.1.S1_at	Os.52629.1.S1_at	0.780314	N/A // N/A
75	Os.10176.1.S1_at	Os.10178.2.S1_a_at	0.779446	LOC_Os07g24190 // CESA3 - cellulose synthase, expressed
76	Os.10176.1.S1_at	Os.46852.1.S1_at	0.778958	LOC_Os10g41430 // nuc-1 negative regulatory protein preg, putative, expressed
77	Os.10176.1.S1_at	Os.7602.1.S1_at	0.778288	LOC_Os02g44108 // beta-expansin 4 precursor, putative, expressed
78	Os.10176.1.S1_at	Os.49509.1.S1_at	0.777217	LOC_Os08g44620 // expressed protein
79	Os.10176.1.S1_at	Os.37660.1.S2_at	0.776856	LOC_Os04g54870 // RNA recognition motif containing protein, putative, expressed
80	Os.10176.1.S1_at	Os.26531.1.S1_s_at	0.774776	LOC_Os02g06840 // beta-1,3-galactosyltransferase sqv-2, putative, expressed
81	Os.10176.1.S1_at	Os.153.1.S1_at	0.773642	LOC_Os05g41990 // peroxidase 1 precursor, putative, expressed
82	Os.10176.1.S1_at	Os.52482.1.S1_at	0.77256	LOC_Os07g36630 // CSLF8 - cellulose synthase-like family F; beta1,3;1,4 glucan synthase, expressed
83	Os.10176.1.S1_at	Os.52438.1.S1_at	0.772165	LOC_Os05g36010 // subtilisin-like protease precursor, putative, expressed
84	Os.10176.1.S1_at	Os.9719.1.S1_at	0.771469	N/A // N/A
85	Os.10176.1.S1_at	OsAffx.12825.1.S1_s_at	0.770497	LOC_Os03g11330 // transferase, transferring glycosyl groups, putative, expressed
86	Os.10176.1.S1_at	Os.5230.1.S1_at	0.770348	LOC_Os11g30810 // flavonol sulfotransferase-like, putative, expressed
87	Os.10176.1.S1_at	Os.25562.1.S1_at	0.769555	LOC_Os05g48270 // dopamine beta-monooxygenase, putative, expressed
88	Os.10176.1.S1_at	Os.7098.1.S1_at	0.767582	LOC_Os05g01810 // xylem cysteine proteinase 2 precursor, putative, expressed
89	Os.10176.1.S1_at	Os.11677.2.S1_at	0.767168	LOC_Os05g03190 // IQD1, putative, expressed
90	Os.10176.1.S1_at	Os.27822.1.A1_at	0.766955	LOC_Os04g47520 // auxin-independent growth promoter, putative, expressed
91	Os.10176.1.S1_at	Os.8247.1.S1_at	0.766683	LOC_Os03g51150 // expressed protein
92	Os.10176.1.S1_at	Os.5451.1.S1_at	0.766397	LOC_Os07g41360 // alpha-1,4-glucan-protein synthase 1, putative, expressed
93	Os.10176.1.S1_at	Os.8555.1.S1_at	0.765803	LOC_Os05g06720 // esterase precursor, putative, expressed
94	Os.10176.1.S1_at	Os.6592.1.S1_a_at	0.765427	LOC_Os05g04380 // peroxidase 1 precursor, putative, expressed
95	Os.10176.1.S1_at	OsAffx.22754.1.S1_s_at	0.765086	LOC_Os01g07410 // axi 1 protein, putative, expressed
96	Os.10176.1.S1_at	Os.8411.1.S1_at	0.764608	LOC_Os04g25560 // serine carboxypeptidase 1 precursor, putative, expressed
97	Os.10176.1.S1_at	Os.10617.1.S1_at	0.763849	LOC_Os04g57560 // lysine-specific histone demethylase 1, putative, expressed
98	Os.10176.1.S1_at	Os.7743.1.S1_at	0.763783	LOC_Os06g11490 // blue copper protein precursor, putative, expressed
99	Os.10176.1.S1_at	Os.8020.1.S1_at	0.762015	LOC_Os06g44620 // 4-coumarate--CoA ligase 1, putative, expressed
100	Os.10176.1.S1_at	Os.27027.1.S1_at	0.760045	LOC_Os09g32010 // ternary complex factor MIP1, putative, expressed
