# Supplementary material for: The Divergent Roles of the Rice bcl-2 Associated Athanogene (BAG) Genes in Plant Development and Environmental Responses
Source: Plants (Basel). 2021 Oct 13;10(10):2169. doi: 10.3390/plants10102169 (PMC8538510; doi:10.3390/plants10102169)
Supplement: Supplementary file 1 [file plants-10-02169-s001.zip › Additional File S12. Pearson correlation coefficient of OsBAGs and OsCESAs expression pattern.xlsx]

## Sheet: file4
Additional file 12. Pearson correlation coefficient of OsBAGs and OsCESAs expression pattern
	OsBAG1	OsBAG3	OsBAG4	OsBAG6	OsCESA1	OsCESA2	OsCESA3	OsCESA4	OsCESA5	OsCESA6	OsCESA7	OsCESA8	OsCESA9	OsCESA10	OsCESA11
OsBAG1	1
OsBAG3	0.769757	1
OsBAG4	0.21388	0.274146	1
OsBAG6	-0.0841381	-0.260695	0.151397	1
OsCESA1	0.713712	0.850362	0.142667	-0.234613	1
OsCESA2	0.315463	0.0247316	0.293068	0.341905	0.15338	1
OsCESA3	0.698697	0.811661	0.369443	-0.28955	0.788479	0.0788778	1
OsCESA4	0.548845	0.653701	0.304672	-0.247218	0.538156	-0.0518645	0.511164	1
OsCESA5	0.752385	0.671713	0.103137	0.0419632	0.765756	0.31586	0.48276	0.298155	1
OsCESA6	0.589622	0.798559	0.266538	0.0860867	0.82367	0.263809	0.58467	0.340469	0.820052	1
OsCESA7	0.556395	0.723222	0.247567	-0.26793	0.610681	-0.0606157	0.540134	0.976097	0.342419	0.442877	1
OsCESA8	0.704666	0.895413	0.102764	-0.321161	0.949733	-0.0182898	0.768631	0.653233	0.710832	0.774147	0.728067	1
OsCESA9	0.529642	0.623642	0.345129	-0.214253	0.497804	-0.0090307	0.44598	0.970048	0.330514	0.332563	0.935324	0.610455	1
OsCESA10	0.513805	0.405375	0.393687	-0.0463625	0.304145	0.171602	0.309881	0.624542	0.388751	0.222731	0.562978	0.393492	0.703672	1
OsCESA11	0.23015	0.109906	-0.0834191	0.00189231	0.0700861	0.304564	0.152989	-0.046988	0.173617	0.120322	-0.00433307	0.0549991	-0.073198	0.0395801	1
